1 **Comparison of the *in vitro* activity of novel and established nitrification inhibitors**  
2 **applied in agriculture: challenging the effectiveness of the currently available**  
3 **compounds**

4

5 Evangelia S. Papadopoulou<sup>1\*</sup>, Eleftheria Bachtsevani<sup>1</sup>, Eleni Lampronikou<sup>1</sup>, Eleni  
6 Adamou<sup>1</sup>, Afroditi Katsaouni<sup>1</sup>, Cécile Thion<sup>2</sup>, Sotirios Vasileiadis<sup>1</sup>, Urania Menkissoglu-  
7 Spiroudi<sup>3</sup>, Graeme W. Nicol<sup>2</sup>, Dimitrios G. Karpouzas<sup>1</sup>.

8

9 *<sup>1</sup>University of Thessaly, Department of Biochemistry and Biotechnology, Laboratory of*  
10 *Plant and Environmental Biotechnology, Viopolis, 41500 Larissa, Greece*

11 *<sup>2</sup>Laboratoire Ampère, École Centrale de Lyon, University of Lyon, 69134 Ecully, France*

12 *<sup>3</sup>Aristotle University of Thessaloniki, School of Agriculture, Forestry and Environment,*  
13 *Faculty of Agriculture, Pesticide Science Laboratory, 54124 Thessaloniki, Greece*

14

15 \* Corresponding author

16 Dr. Evangelia S. Papadopoulou

17 Tel. +30-2410-565232, Fax. +30-2410-565290, Email. [evapapadopoulou@bio.uth.gr](mailto:evapapadopoulou@bio.uth.gr)

18 **Abbreviations<sup>1</sup>**

---

<sup>1</sup>NIs: nitrification inhibitors, EQ: ethoxyquin; QI: 2,6-dihydro-2,2,4-trimethyl-6-quinone imine; EQNL: 2,4-dimethyl-6-ethoxyquinoline; DCD: dicyandiamide, NP: nitrapyrin,

19 **ABSTRACT** Nitrification inhibitors (NIs) applied to soil reduce nitrogen fertilizer losses  
20 from agricultural ecosystems. Currently available NIs appear to selectively inhibit  
21 ammonia-oxidizing bacteria (AOB), while their impact on other groups of nitrifiers is  
22 limited. Ethoxyquin (EQ), a preservative shown to inhibit ammonia-oxidizers (AO) in soil,  
23 is rapidly transformed to 2,6-dihydro-2,2,4-trimethyl-6-quinone imine (QI) and 2,4-  
24 dimethyl-6-ethoxy-quinoline (EQNL). We compared the inhibitory potential of EQ and its  
25 derivatives *in vitro* with other established NIs that have been applied in an agricultural  
26 setting (dicyandiamide (DCD), nitrapyrin (NP), 3,4-dimethylpyrazole phosphate (DMPP))  
27 by evaluating their impact on the activity and growth of five soil-derived strains (two AOB  
28 (*Nitrosomonas europaea*, *Nitrospira multiformis*), two ammonia-oxidizing archaea  
29 (AOA) (“*Candidatus Nitrosocosmicus franklandus*”, “*Candidatus Nitrosotalea sinensis*”),  
30 and one nitrite-oxidizing bacterium (NOB) (*Nitrobacter* sp.)). NIs degradation was also  
31 determined. AOA were more sensitive than AOB or NOB to EQ and its derivatives. Despite  
32 its transient character, QI was primarily responsible for AO inhibition by EQ, and the most  
33 potent NI against AOA. For AOB, QI was more potent than DCD but less than nitrapyrin  
34 and DMPP. AOA and NOB showed higher tolerance to the persistent compounds DCD  
35 and DMPP. Our findings benchmark the activity range of known and novel NIs with  
36 practical implications for their use, and the development of novel NIs with broad or  
37 complementary activity against all AO.

---

DMPP: 3,4-dimethylpyrazole phosphate, AOB: ammonia-oxidizing bacteria, AOA:  
ammonia-oxidizing archaea, AO: ammonia-oxidizers, NOB: nitrite-oxidizing bacteria,  
comammox: complete ammonia-oxidizing bacteria; AMO: ammonia monooxygenase

38

39 **KEYWORDS** nitrification inhibitors, ethoxyquin, quinone imine, ammonia-oxidizing  
40 bacteria, ammonia-oxidizing archaea, nitrite-oxidizing bacteria, *in vitro* assays

41

42 Modern agricultural systems depend heavily on large inputs of synthetic N fertilizers to  
43 maintain crop productivity and alleviate food crisis for the growing global population (1).  
44 However, approximately 70% of the annual global input of 100 Tg N fertilizer is lost from  
45 agricultural ecosystems due to nitrification and subsequent denitrification processes  
46 leading to groundwater and atmospheric pollution through nitrate leaching and nitrogen  
47 oxides (NxO) emissions, respectively (2). To reduce N losses and improve nitrogen use  
48 efficiency, nitrification inhibitors (NIs) are routinely incorporated into N-stabilized  
49 fertilizers to reduce the activities of nitrifying prokaryotes and increase N retention time in  
50 soil (3, 4).

51        Hundreds of compounds have been identified as potential NIs (5), but only three of  
52 them have gained importance for practical use on a global scale: 2-chloro-6-  
53 (trichloromethyl) pyridine (nitrapyrin) (NP) (6), dicyandiamide (DCD) (7), and 3,4-  
54 dimethylpyrazole phosphate (DMPP) (8). All three are known to act on ammonia  
55 monooxygenase (AMO), a key enzyme in the first and rate-limiting step of nitrification (9).  
56 In particular, NP is believed to act either as copper chelator or “suicide” inhibitor (10, 11),  
57 while the mode of action of DCD and DMPP is not yet fully established.

58        When NIs were first developed for widespread use, nitrification was considered a  
59 two-step process carried out by ammonia- (AOB) and nitrite-oxidizing bacteria (NOB).

60 AOB oxidize ammonia to hydroxylamine (NH<sub>2</sub>OH) via AMO, which is further oxidized  
61 through to nitrite (NO<sub>2</sub><sup>-</sup>). NOB subsequently transform NO<sub>2</sub><sup>-</sup> to nitrate (NO<sub>3</sub><sup>-</sup>) via nitrite  
62 oxidoreductase (NXR) (12, 13). However, over the last 15 years, other groups contributing  
63 to nitrification have been discovered including ammonia-oxidizing archaea (AOA) (14,  
64 15), and ‘comammox’ *Nitrospira* that are able to perform complete oxidation of ammonia  
65 to nitrate within an individual cell (16, 17).

66         These breakthroughs in the microbiology and biochemistry of nitrification were not  
67 accompanied by complementary advances on NI research with respect to their spectrum of  
68 activity. Most studies have focused on AOB (18- 21), and only recently the activity of NIs  
69 on AOA was explored (22, 23), while their activity on other groups of nitrifiers (including  
70 NOB and comammox bacteria) is not known. Current knowledge of the activity of NIs has  
71 been derived from soil microcosm studies where AOB appear to be functionally dominant  
72 (24 -29). The only available *in vitro* study assessing the comparative activity of NIs on soil-  
73 derived AOB and AOA isolates, revealed selective inhibitory activity of DCD and NP  
74 against AOB and AOA, respectively (23).

75         The variation in sensitivity toward different types of NIs, combined with the  
76 contribution of AOA, NOB and comammox bacteria to nitrification in distinct ecological  
77 niches (30, 31) suggests a suboptimal efficiency of the currently available NIs, and stresses  
78 the need for the discovery of novel NIs with a broader range of activity against all  
79 microorganisms contributing to nitrification. The use of *in vitro* inhibition assays with a  
80 diverse range of soil-derived strains is therefore a necessary benchmarking step to define  
81 the exact spectrum of activity of novel and known NIs.

82           In previous soil microcosm studies we showed that ethoxyquin (EQ) (1,2-dihydro-  
83   6-ethoxy-2,2,4-trimethylquinoline), an antioxidant used as preservative in fruit-packaging  
84   plants, and its derivative 2,6-dihydro-2,2,4-trimethyl-6-quinone imine (QI), strongly  
85   inhibited the activity of AOB and AOA (32). EQ in soil is rapidly transformed to QI and  
86   2,4-dimethyl-6-ethoxyquinoline (EQNL), with the former being the major metabolite (33).  
87   The capacity of EQ to be rapidly transformed in soil to possibly potent NIs has particular  
88   interest at the application level, considering that the spectrum and the duration of inhibition  
89   are desirable attributes of NIs in practice.

90           We aimed to determine, at the *in vitro* level, the inhibitory potency of EQ and its  
91   derivatives on representative soil strains of AOB and AOA, in comparison with three  
92   widely used NIs (NP, DCD, and DMPP), whose full spectrum of activity against different  
93   ammonia-oxidizers (AO) has not yet been fully established. We expanded our *in vitro*  
94   inhibition assays to NOB, whose response to NIs is largely unknown, to gain insights on  
95   the impact of NIs on microbial groups functionally associated with ammonia oxidation.  
96   Specifically, we determined the inhibitory effects on the growth and activity of two AOB  
97   strains (*Nitrosomonas europaea* ATCC25978, *Nitrospira multiformis* ATCC 25196),  
98   two AOA strains (“*Candidatus Nitrosocosmicus franklandus*” C13 and “*Candidatus*  
99   *Nitrosotalea sinensis*” ND2) and one NOB strain (*Nitrobacter* sp. NHB1) using q-PCR to  
100   measure the abundance of *amoA* or *nxB* functional genes, and the production or  
101   consumption of nitrite, for AO or NOB, respectively. To establish possible correlations  
102   between NI presence and inhibition, their degradation and transformation (for EQ) were  
103   also determined.

104

## 105 RESULTS

106 **The impact of NIs on the activity and growth of AOB isolates.** The effects of six  
107 NIs (EQ, QI, EQNL, DCD, NP and DMPP) on the activity and growth of the two AOB  
108 isolates were initially tested over a range of concentration levels. EQ strongly inhibited  
109 ammonia oxidation in liquid cultures of *N. europaea* (Fig. 1a) and *N. multiformis* (Fig. 2a)  
110 only at the concentration of 460  $\mu\text{M}$ . QI completely inhibited ammonia oxidation by *N.*  
111 *europaea* (Fig. 1b) and *N. multiformis* (Fig. 2b) at concentrations  $\geq 270 \mu\text{M}$  and  $\geq 135 \mu\text{M}$ ,  
112 respectively. In contrast, EQNL only temporarily inhibited *N. europaea* activity at the  
113 highest concentration tested, 500  $\mu\text{M}$  (Fig. 1c), while at the same concentration level *N.*  
114 *multiformis* activity was fully inhibited (Fig. 2c).

115 For the established NIs, DCD inhibited the activity of both AOB strains at  
116 concentrations of 250  $\mu\text{M}$  and 500  $\mu\text{M}$  (Fig. 1d), with a mere recovery of *N. multiformis* at  
117 250  $\mu\text{M}$  (Fig 2d). NP completely inhibited the activity of both *N. europaea* and *N.*  
118 *multiformis* at concentrations of  $\geq 5 \mu\text{M}$  (Fig. 1e and 2e). Similarly, DMPP reduced nitrite  
119 production by both AOB isolates at concentrations  $\geq 1 \mu\text{M}$ , with a late recovery observed  
120 only for *N. europaea* at 1  $\mu\text{M}$  (Fig. 1f and 2f), and complete inhibition observed at  
121 concentrations  $\geq 10 \mu\text{M}$ . The inhibition of AOB growth as determined by measurements of  
122 *amoA* gene abundance were in agreement with the  $\text{NO}_2^-$  production rates (Fig. S1 and S2)  
123 with the exception of a low level inhibition ( $22.9 \pm 3.9 \%$ ) of *N. multiformis* growth at 0.1  
124  $\mu\text{M}$  DMPP compared to the control, despite no difference in nitrite production rates (Fig.  
125 S2f).

126 Based on the inhibition assays,  $\text{EC}_{50}$  values for each strain x compound combination  
127 were calculated. The two AOB showed equivalent  $\text{EC}_{50}$  values for the different NIs tested

128 with the sole exception of EQ derivatives. Higher EC<sub>50</sub> values were observed for *N.*  
129 *europaea* (199.8±16.0 and 543.4±111.5 µM for QI and EQNL, respectively) compared to  
130 *N. multiformis* (65.1±6.0 and 360.5±105.7 µM) (Table 1). DMPP and NP were the most  
131 potent inhibitors of *N. europaea* (EC<sub>50</sub> = 2.1±0.7 and 2.1±0.4 µM, respectively), followed  
132 by EQ, QI, and DCD which did not differ in their ability to inhibit *N. europaea*, with EQNL  
133 being the weakest inhibitor (EC<sub>50</sub> = 181.4±23.3 µM) (Table 1). For *N. multiformis*, DMPP,  
134 NP, and QI were equally effective and the most potent inhibitors, with EC<sub>50</sub> values of  
135 0.6±0.1, 0.8±0.3, and 65.1±0.6 µM, respectively, followed by EQ (EC<sub>50</sub> = 214.8±39.6 µM),  
136 DCD (EC<sub>50</sub> = 248.7±7.4 µM) and EQNL (EC<sub>50</sub> = 360.5±105.7 µM) (Table 1).

137 **The impact of NIs on the activity and growth of AOA isolates.** We further tested  
138 the inhibitory effects of NIs on the activity and growth of two soil-derived AOA isolates.  
139 The activity of “*Ca. N. franklandus*” (Fig. 3a) and “*Ca. N. sinensis*” (Fig. 4a) was  
140 significantly reduced by EQ at concentrations ≥ 4.6 µM and ≥ 0.46 µM, respectively.  
141 However, complete recovery of “*Ca. N. sinensis*” activity was observed at 0.46 µM (Fig.  
142 4a). QI significantly reduced the activity of AOA at all concentrations, with a gradual  
143 recovery observed for only “*Ca. N. franklandus*” at the lowest concentration level (0.27  
144 µM) (Fig. 3b and 4b). EQNL suppressed ammonia oxidation by “*Ca. N. franklandus*” (Fig.  
145 3c) and “*Ca. N. sinensis*” (Fig. 4c) at concentrations ≥ 125 µM and ≥ 25µM, respectively,  
146 although recovery was observed. The impact of EQNL on the growth of “*Ca. N.*  
147 *franklandus*” was not fully consistent with the activity measurements, and no significant  
148 differences among the different concentrations were observed at the end of the incubation  
149 period (Fig. S3).

150           Regarding the other NIs, DCD halted the activity of “*Ca. N. franklandus*” (Fig. 3d)  
151 and “*Ca. N. sinensis*” (Fig. 4d) at concentrations  $\geq 1000 \mu\text{M}$  and  $\geq 500 \mu\text{M}$  respectively,  
152 with a complete recovery observed only for “*Ca. N. franklandus*” at  $1000 \mu\text{M}$ . However,  
153 based on growth measurements, DCD significantly reduced “*Ca. N. franklandus*” growth  
154 even at  $500 \mu\text{M}$  (Fig. S3). NP significantly reduced the activity of “*Ca. N. franklandus*”  
155 (Fig. 3e) and “*Ca. N. sinensis*” (Fig. 4e) at concentrations  $\geq 1 \mu\text{M}$  and  $\geq 5 \mu\text{M}$ , respectively,  
156 although recovery was observed at these concentrations at the end of the incubation.  
157 Finally, DMPP inhibited the activity of both AOA isolates at concentrations  $\geq 500 \mu\text{M}$  (Fig.  
158 3f and 4f). However, complete recovery was observed for “*Ca. N. franklandus*” at 500,  
159 1000, and  $2500 \mu\text{M}$  (Fig. 3f), and for “*Ca. N. sinensis*” only at  $500 \mu\text{M}$  (Fig. 4f). In certain  
160 cases, the impact of DMPP on nitrite production was not concomitant with growth patterns.  
161 Hence, DMPP concentrations  $\geq 500 \mu\text{M}$  induced a persistent reduction in *amoA* gene  
162 abundance of “*Ca. N. franklandus*” (Fig. S3), while “*Ca. N. sinensis*” showed complete  
163 recovery of its growth at all tested concentrations at the end of the incubation period (Fig.  
164 S4).

165           When  $\text{EC}_{50}$  values were calculated “*Ca. N. franklandus*” differed in its sensitivity  
166 to DCD and DMPP compared to “*Ca. N. sinensis*”, with the former being more tolerant to  
167 both DCD ( $\text{EC}_{50}$  of  $1568.5 \pm 237.1 \mu\text{M}$  compared to  $477.8 \pm 56.6 \mu\text{M}$  for “*Ca. N. sinensis*”),  
168 and DMPP ( $\text{EC}_{50}$  of  $1773.7 \pm 359.5 \mu\text{M}$  compared to  $359.5 \pm 43.1 \mu\text{M}$  for “*Ca. N.*  
169 *sinensis*”) (Table 1). DCD and DMPP were also the weakest AOA inhibitors from those  
170 tested (Table 1). In contrast, EQ and its oxidative derivatives as well as NP were equally  
171 effective inhibitors of both AOA isolates, with QI scoring the lowest  $\text{EC}_{50}$  values ( $0.7 \pm 0.4$   
172 and  $0.3 \pm 0.0 \mu\text{M}$  for “*Ca. N. franklandus*” and “*Ca. N. sinensis*”, respectively).



173           **The impact of NIs on the activity and growth of *Nitrobacter* sp. NHB1.** Nitrite  
174 oxidation by *Nitrobacter* sp. NHB1 was completely inhibited by EQ, EQNL, and DMPP  
175 only at the highest tested concentrations of 460  $\mu$ M, 500  $\mu$ M, and 25000  $\mu$ M, respectively,  
176 and DCD was not inhibitory even at the highest concentration tested (100000  $\mu$ M) (Fig. 5).  
177 In contrast, QI and NP significantly suppressed *Nitrobacter* sp. NHB1 activity at  
178 concentrations  $\geq 135$   $\mu$ M and  $\geq 100$   $\mu$ M, respectively, though recovery was observed for QI  
179 at 135  $\mu$ M and 270  $\mu$ M (Fig. 5). We observed variations in the growth inhibition patterns  
180 of the tested NIs (assessed as a lack of increase in *nxB* gene abundance). EQ induced a  
181 significant reduction in the growth of *Nitrobacter* sp. NHB1 at all concentration levels at  
182 the end of the incubation period. QI strongly inhibited growth at concentrations  $\geq 135$   $\mu$ M,  
183 while EQNL did not affect bacterial growth even at the highest concentration level (500  
184  $\mu$ M) (Fig. S5). On the contrary, DCD at 100000  $\mu$ M, and DMPP at concentrations  $\geq 25000$   
185  $\mu$ M significantly suppressed *Nitrobacter* sp. NHB1 growth (Fig. S5). When  $EC_{50}$  values  
186 were calculated EQ, QI, EQNL and NP were equally suppressive towards *Nitrobacter* sp.  
187 NHB1, while DMPP and DCD showed no appreciable inhibition (Table 1).

188           **Degradation of NIs in the *in vitro* assays.** We further determined the degradation  
189 of all tested NIs during the *in vitro* assays to establish whether there is a relationship  
190 between the length of exposure and inhibition. The degradation of NIs in most cases was  
191 best described by the single first order (SFO) kinetic model ( $\chi^2 \leq 15$ ,  $r^2 \geq 0.75$ ), with the  
192 exception of NP which in certain treatments followed a biphasic degradation pattern (Table  
193 S1). EQ was rapidly transformed to QI and EQNL. QI was detected at concentrations below  
194 its  $EC_{50}$  values for AOB/NOB but above its  $EC_{50}$  values for AOA at the onset of EQ-  
195 induced inhibition, (Tables 1 and 2). However, the maximum concentrations of QI formed

196 in these cultures were equivalent or higher than the EC<sub>50s</sub> for *N. europaea* and *N.*  
197 *multiformis* (AOB), respectively, while still lower than that for *Nitrobacter* sp. NHB1  
198 (NOB). In contrast, EQNL was always formed at much lower concentrations than the  
199 estimated EC<sub>50s</sub> for AO and NOB with the exception of its maximum recorded  
200 concentration in the liquid culture of “*Ca. N. sinensis*” amended with 460 μM EQ (Table  
201 1 and 2, Fig. S6). The degradation half-life (DT<sub>50</sub>) for the sum of EQ+QI+EQNL ranged  
202 from 2.1 to 60.1 days in the cultures of *Nitrobacter* sp. NHB1 and *N. multiformis*  
203 respectively when amended with 460 μM of EQ (Table S1). QI showed limited persistence  
204 and a weak dose-dependent degradation pattern with DT<sub>50</sub> = 0.05 - 1.52 days at the lowest  
205 concentration level (2.7 μM) and 2.23 - 5.65 days at the highest concentration level (540  
206 μM). In contrast, EQNL persisted in the liquid cultures throughout the experiment  
207 (extrapolated DT<sub>50</sub> values >1000 days) (Table S1).

208 All other NIs did not show a clear dose-dependent degradation pattern. DMPP and  
209 DCD were rather persistent with their DT<sub>50</sub> values varying from 4.34 to >1000 days and  
210 45.9 days to >1000 days respectively. In contrast NP was rapidly degraded in most  
211 treatments with DT<sub>50</sub> values ranging from 0.12 to 12.5 days (Table S1).

212

## 213 **DISCUSSION**

214 We determined *in vitro* the inhibition potency of EQ and its oxidation derivatives, QI and  
215 EQNL, on the growth and activity of a range of soil nitrifiers and compared them to the  
216 NIs most widely used in agricultural practice (DCD, NP, and DMPP). Five isolates,  
217 representative of diverse and globally distributed lineages of soil AO (34, 35) and NOB  
218 (36), were tested. *N. europaea* and *N. multiformis* are representatives of AOB clusters 3

219 and 7, respectively (37), and are commonly used as model soil AOB, with cluster 3  
220 sequences being often the dominant lineage in agricultural and grassland soil ecosystems  
221 (38, 39, 34). The two soil AOA isolates represent contrasting ecological niches, with “*Ca.*  
222 *N. franklandus* (40) and “*Ca. N. sinensis*” (41, 42) being representatives of widely  
223 distributed neutrophilic and acidophilic AOA lineages, respectively. *Nitrobacter* sp. NHB1  
224 (43) was chosen as a representative of one of the two dominant NOB lineages found in soil  
225 (36), with *Nitrobacter* strains typically having greater nitrite oxidation activity compared  
226 to those from the genus *Nitrospira* (44, 45).

227         We first determined the inhibitory potential of EQ to AO and NOB. As a powerful  
228 antioxidant, EQ is prone to oxidation, producing a range of transformation products  
229 depending on the interacting matrix (e.g. animals, plants, and soils) (46). In this study, EQ  
230 was rapidly transformed to QI and EQNL, with the former being the major but least  
231 persistent transformation product, while the latter being a minor but more persistent  
232 product, in line with previous studies in soil (32, 33). We observed a different inhibition  
233 potential for AOB and AOA. All three compounds were more potent inhibitors of the two  
234 AOA isolates compared to AOB isolates, with *N. multiformis* being more sensitive than *N.*  
235 *europaea*. EQ was characterized by EC<sub>50</sub> values lower than those of EQNL, but equal or  
236 higher (only in case of *N. multiformis*) than those of QI. Given the transformation pattern  
237 of EQ in the microbial cultures, we presume that its calculated EC<sub>50</sub> values also include the  
238 activity of its two oxidative derivatives, QI and EQNL. Considering that in the cultures  
239 inhibited by EQ (i) EQNL was formed at concentrations substantially lower than those  
240 expected to result in an inhibitory effect on the AO tested, and (ii) QI was formed at  
241 concentrations equal or higher than those expected to induce an inhibitory effect on the AO

242 tested, we suggest that QI is the main determinant of the persistent inhibitory effect of EQ  
243 on AO and NOB. This is consistent with our previous soil studies where EQ, but mostly  
244 QI when applied alone, induced a significant inhibition of potential nitrification and  
245 transcription of both bacterial and archaeal *amoA* genes (32). Unlike our previous soil  
246 studies where QI showed equivalent inhibitory effects against AOB and AOA, we observed  
247 a difference in the inhibition potential of QI between these two AO groups. This  
248 discrepancy could be attributed to the concentrations of QI applied or formed in soil  
249 samples (up to 86.1  $\mu\text{mol Kg}^{-1}$  dwt soil) which most probably reached the inhibition  
250 threshold levels for both AO groups. Further studies under a range of conditions known to  
251 affect the activity of AO in soil (e.g. soil pH,  $\text{NH}_4^+$  amendment) or the performance of NIs  
252 (e.g. rate of application, temperature, N source) will determine the potency of these  
253 compounds as broad range or AOA-specific NIs.

254 To establish the full potential of EQ or its derivatives as new potent NIs, we  
255 compared them with the *in vitro* inhibitory activity of three established NIs. In contrast to  
256 EQ and its derivatives, DCD exhibited higher *in vitro* toxicity towards AOB isolates  
257 compared to AOA, in line with most previous soil studies (47-49). In our study, DCD  
258 inhibited both AOA isolates at concentrations  $\geq 500 \mu\text{M}$ . Similar *in vitro* tests with soil  
259 enrichment cultures of AOA *Nitrososphaera* sp. JG1 and *Nitrosarchaeum koreense* MY1,  
260 showed strong inhibition by DCD at 500  $\mu\text{M}$  (50, 51), while a pure isolate of “*Ca.*  
261 *Nitrosotalea devanatera*” ND1 was inhibited at concentrations  $>1000 \mu\text{M}$  (22).  
262 Furthermore, Shen *et al.*, (23) reported an  $\text{EC}_{50}$  of 940.6 ( $\pm 85.3$ )  $\mu\text{M}$  for *Nitrososphaera*  
263 *viennensis* EN76. It is interesting to note that “*Ca. N. sinensis*” and “*Ca. N. franklandus*”  
264 have different sensitivities to DCD compared to their phylogenetically associated strains

265 “*Ca. Nitrosotalea devanatera*” ND1 and *Nitrososphaera viennensis* EN76, respectively.  
266 Despite being closely related, the two *Nitrosotalea* isolates exhibit different physiologies  
267 which might explain the observed differences. Although “*Ca. N. sinensis*” ( $\mu_{\max} = 0.025$   
268  $\text{h}^{-1}$ ) grows approximately twice as fast as “*Ca. N. devanatera* (ND1)” ( $\mu_{\max} = 0.011 \text{ h}^{-1}$ ),  
269 their cell yields are similar (4-4.5 cells  $\mu\text{M}^{-1} \text{ NH}_3$ ), while the specific cell activity of ND1  
270 ( $0.072 \text{ fmol NO}_2^- \text{ cell}^{-1} \text{ h}^{-1}$ ) is slightly higher than this of “*Ca. N. sinensis*” ( $0.065 \text{ fmol}$   
271  $\text{NO}_2^- \text{ cell}^{-1} \text{ h}^{-1}$ ) (40). On the other hand, the two *Nitrososphaera* isolates are characterized  
272 by similar growth rates ( $\mu_{\max} = 0,024 \text{ h}^{-1}$ ). In contrast to our results, a 3x lower  $\text{EC}_{50}$  was  
273 reported by Shen *et al.* (23) for *N. multiformis* ( $\text{EC}_{50} = 80.28 (\pm 6.20) \mu\text{M}$  vs.  $248.7 (\pm 7.4)$   
274  $\mu\text{M}$  in our study). However, the persistence of DCD in the cultures was not determined.

275         Similar to DCD, the more recently discovered DMPP showed higher inhibition  
276 potency to AOB compared to AOA. For the AOA, “*Ca. N. franklandus*” was less sensitive  
277 to DMPP than “*Ca. N. sinensis*”, a difference potentially attributed to the higher specific  
278 cell activity of “*Ca. N. franklandus*” ( $2.02$  vs.  $0.065 \text{ fmol NO}_2^- \text{ cell}^{-1} \text{ h}^{-1}$  for “*Ca. N.*  
279 *sinensis*”) (40). A differential activity of DMPP towards AOA and AOB has been observed  
280 previously in soil studies (28, 52-54), although the bioactivity of DMPP in soil, unlike *in*  
281 *vitro* tests, is influenced by various edaphic, environmental and microbial factors (55). Our  
282 study provides the first data on the *in vitro* range activity of DMPP against soil AO.

283         NP was the only tested NI that showed an equivalent and strong inhibitory effect  
284 towards both AOB and AOA isolates, suppressing their activity at concentrations  $\geq 1 \mu\text{M}$ .  
285 In accordance with our results, previous studies had found that NP inhibited the activity of  
286 *Nitrosomonas*, *Nitrospira*, and *Nitrosolobus* strains at concentrations  $\geq 0.86 \mu\text{M}$  (18).  
287 Comparative tests with various terrestrial and marine AOA (*Nitrososphaera* sp. JG1,

288 *Nitrosarchaeum koreense* MY1, *Nitrosopumilus maritimus* SCM1, and *Nitrosopumilus*  
289 *cobalaminigenes* HCA1), and AOB (including *N. europaea* and *N. multiformis*), showed  
290 an inhibitory effect of NP at 10  $\mu\text{M}$  (56, 51, 57). In line with our findings for “*Ca. N.*  
291 *sinensis*” ( $\text{EC}_{50} = 6.7 \mu\text{M}$ ), Lehtovirta-Morley *et al.*, (22) reported that NP halted the  
292 activity and growth of the phylogenetically closely related “*Ca. N. devanaterrea*” ND1 at  
293 concentrations  $\geq 10 \mu\text{M}$ . In contrast, Shen *et al.*, (23) reported significantly higher  $\text{EC}_{50}$   
294 values for NP ( $> 173 \mu\text{M}$  and  $118.1 \mu\text{M}$  for *N. multiformis* and *N. viennensis*, respectively).  
295 This could be due to the different approach used by Shen *et al.* (23) for adding NP into the  
296 cultures. This involved adding non-dissolved NP in the culture medium to achieve  
297 concentrations in the range of 40-173  $\mu\text{M}$ , with the highest level corresponding to the upper  
298 limit of NP water solubility at  $20^\circ\text{C}$  ( $40 \text{ mg L}^{-1}$ ) entailing a risk for precipitation of the  
299 active compound during incubation at  $28^\circ\text{C}$  (*N. multiformis*) or  $37^\circ\text{C}$  (*N. viennensis*). Soil  
300 studies with NP, although limited, are influenced by the relative functional dominance of  
301 one group of AO over another and the applied concentration of the inhibitor. Cui *et al.*,  
302 (27) reported preferential inhibition of AOB by NP applied at  $1.3 \mu\text{mol Kg}^{-1}$ . Conversely,  
303 Lehtovirta-Morley *et al.*, (22) found AOA to be sensitive to NP at concentrations  $\geq 10 \mu\text{mol}$   
304  $\text{Kg}^{-1}$  in an acidic soil where “*Ca. N. devanaterrea*” ND1 was dominant.

305 A comparative analysis of the inhibitory range of the tested NIs highlights the  
306 serious practical implications of our findings (Fig. 6). DMPP and NP were equally effective  
307 and the most potent NIs against AOB, followed by QI, (EQ), and DCD, with QI being more  
308 active than DCD against *N. multiformis*. On the other hand, QI (EQ) and NP were equally  
309 effective and the most active NIs against AOA, while DCD and DMPP, were not inhibitory  
310 to AOA at the concentrations tested (Fig. 6). These findings suggest that NP is the only

311 commercial NI capable of effectively inhibiting both AOB and AOA, and hence the most  
312 effective currently available NI, although it is not currently registered for use in Europe.  
313 30% of the World's soils have a pH <5.5 and European agricultural soils have a mean pH  
314 of 5.8 (58). These results therefore have practical implications for low pH soils where  
315 ammonia oxidation may be dominated by AOA (41). Slight differences in the inhibition  
316 thresholds between AOA and AOB may largely affect agricultural practice, since AOA are  
317 expected to contribute to nitrogen fertilizer loss in conditions where AOB would be  
318 inhibited (22). On the other hand, universal inhibitory effects on both AOB and AOA (and  
319 comammox bacteria) suggest that nitrification inhibition will not be compromised by  
320 functional redundancy. Alternatively, the use of mixtures of NIs exhibiting complementary  
321 activity against different AO groups or targeting different parts of the ammonia oxidation  
322 pathway could be equally efficient with broad range NIs. In this regard, the potential use  
323 of EQ as a novel NI is promising, considering its unique feature to be transformed in soil  
324 to QI, which is a highly potent inhibitor of AOA, and has a satisfactory inhibitory effect on  
325 AOB, comparable with that of established NIs such as DCD.

326 In addition to the practical implications, the considerable differences in the range  
327 of inhibitory activities exhibited by the tested NIs might indicate differences in their mode  
328 of action not considered before. For example, DCD, DMPP and NP, all considered as Cu-  
329 chelators, showed variable activity towards AOA, which, unlike AOB, rely on copper-  
330 containing proteins for electron transfer (59). NP on the other hand was previously  
331 proposed to serve also as an alternative AMO substrate, generating products (6-  
332 chloropicolinic acid) that irreversibly deactivate ammonia oxidation (10). This dual  
333 inhibitory mechanism of NP might offer an explanation for its more universal inhibitory

334 activity towards both AOA and AOB. EQ and its derivatives possess high-antioxidative  
335 capacity acting as free radical scavengers (46). As EQ and QI showed similar inhibitory  
336 effects to other NO-scavengers (e.g. PTIO) (57), their effectivity against AOA may be due  
337 to a similar mode of action. Alternatively, as QI is a strong antioxidant, it could be involved  
338 in oxidative stress-related cell disruption particularly in AOA, with AOB being capable of  
339 coping with oxidative stress using catalases which are largely absent in AOA (60). Further  
340 studies should define the inhibition mechanism of EQ on AO and clarify the corresponding  
341 mechanisms of the other NIs which remain unknown.

342         Given the effect of NIs on AO, they will also have an indirect inhibitory effect on  
343 NOB, the functional partners of AO. We demonstrated that DMPP and DCD, despite their  
344 strong impact on AOB, had no inhibitory effect on *Nitrobacter* sp. NHB1, in contrast to  
345 NP, EQ and its derivatives which were more active against *Nitrobacter* sp. NHB1. Previous  
346 soil studies also demonstrated that DCD was not suppressive to *Nitrospira*- and  
347 *Nitrobacter*-like bacteria at levels up to 150  $\mu\text{mol Kg}^{-1}$  soil (61, 62, 49). To date there are  
348 no data, either *in vitro* or in soil, regarding the impact of DMPP or EQ and its derivatives  
349 on NOB, while NP applied at rates up to 50  $\mu\text{M}$  did not inhibit the nitrite-oxidizing activity  
350 of the widely distributed *Nitrobacter agilis* (20). We provide the first evidence for the  
351 toxicity of NIs on a *Nitrobacter* sp. Further studies extended to other NOB, including the  
352 widely distributed and diverse *Nitrospira*-like bacteria, would determine the full inhibitory  
353 potential of NIs on soil NOB.

354         In parallel to activity and growth measurements, we determined the degradation and  
355 transformation of the tested NIs to identify potential links between the duration of exposure  
356 (persistence) and the effects observed. The total residues of EQ showed limited persistence



357 in the AOA and NOB cultures ( $DT_{50} = 2.4-8.7$  days), and low to moderate persistence in  
358 the AOB cultures ( $DT_{50} = 8.7-60.1$  days), a difference most likely attributed to abiotic  
359 factors such as medium pH (acidic for AOA and NOB vs. alkaline for AOB) rather than an  
360 enzymatic transformation, considering the autotrophic lifestyle of the tested isolates (60)  
361 and the recalcitrance of EQ under aerobic and anaerobic conditions (63). However, a direct  
362 interaction of these compounds with the tested organisms cannot not be excluded (10). The  
363 three commercial NIs showed remarkably different stability in the liquid cultures. DCD  
364 showed moderate to high persistence ( $DT_{50s} = 44.5$  to  $>1000$  days), whereas NP degraded  
365 rapidly ( $DT_{50} = 0.12-12.5$  days). DMPP showed a high persistence in all liquid cultures,  
366 with the exception of *Nitrobacter* cultures where a great variation in the persistence of  
367 DMPP was observed. Considering that *Nitrobacter* sp. NHB1 and AOA were cultured in  
368 media of similar content and pH, the above variation was possibly induced by interaction  
369 between the NI and the *Nitrobacter* sp. strain. Overall, we did not observe any clear  
370 correlations between NIs persistence and inhibition potency.

371

372 **Conclusions.** We determined *in vitro* the inhibition potential of novel (EQ and its  
373 derivatives) and all NIs currently used in the agricultural practice on representative soil-  
374 derived AOA, AOB, and NOB. EQ, and primarily its major transformation product QI,  
375 showed high potency against AOA, in contrast to DCD and DMPP, the only NIs currently  
376 registered for use in Europe and which are inhibitory only to AOB. In contrast, NP showed  
377 an inhibitory activity against all groups tested. The activity of those NIs on comammox  
378 bacteria are still unknown due to the lack of soil-derived isolates, and their characterization  
379 will be required to provide a complete understanding of their inhibition potency on all AO.

380 Our study (i) offers benchmarking knowledge of the activity range of known and  
381 potentially new NIs to soil AO and *Nitrobacter* NOB, (ii) introduces the novel potential  
382 NI EQ, which possesses desirable characteristics including transformation into another  
383 potent NI, QI, which has high potency against AOA in contrast to other registered NIs in  
384 Europe, and (iii) demonstrates the different sensitivity of AOA and AOB to NIs, providing  
385 potentially novel strategies relying on new broad-range NIs, or more likely, using mixtures  
386 of NIs which possess complementary activity against different nitrifier groups. Further  
387 elucidation of EQ and QI inhibitory mechanisms, and verification of their efficacy under  
388 diverse soil conditions affecting both the activity of AO and the performance of NIs, might  
389 lead to the development of a novel NI for more efficient N conservation in agricultural  
390 soils.

391

## 392 MATERIAL AND METHODS

393 **Microbial strains, growth conditions and chemicals.** Five soil-derived nitrifying  
394 isolates were used in the *in vitro* assays: two AOB (*N. europaea*, *N. multiformis*), two AOA  
395 (“*Ca. N. franklandus*”, “*Ca. N. sinensis*”), and one NOB (*Nitrobacter* sp. NHB1). All  
396 strains were grown aerobically in the dark without shaking. Details on the cultivation media  
397 and incubation temperatures used are given in the Supplemental Material.

398 Analytical standards of DCD (99 % purity), NP ( $\geq 98$  %), and EQ (95%) were  
399 purchased from Sigma-Aldrich (Germany), while the DMPP (99.1%) analytical standard  
400 was provided by BASF Hellas. The oxidation derivatives of EQ, QI and EQNL were  
401 synthesized as described by Thorisson *et al.* (64). The chemical structures of all studied  
402 compounds are shown in Fig. S7.

403           **Liquid culture assays.** The activity of all NIs was determined in liquid batch  
404 cultures over a broad range of concentrations to establish relevant inhibition thresholds  
405 (EC<sub>50</sub> values) per strain and compound. For each, triplicate strain x NI x concentration  
406 replicates were established in 100-mL Duran bottles containing 50 mL of growth medium  
407 and inoculated with a 1 or 2% (v/v) transfer from exponentially growing cultures of AOB  
408 or AOA/NOB, respectively. EQ, QI, EQNL and NP were added to the cultures as filter  
409 sterilized DMSO solutions due to their low water solubility ( $\leq 60$  mg L<sup>-1</sup> at 20°C) and the  
410 final concentration of DMSO in all cultures was 0.1% (v/v). DCD and DMPP were  
411 dissolved in sterile dH<sub>2</sub>O before addition of 25  $\mu$ l (0.5% v/v) in the different cultures. All  
412 NIs were added to batch cultures at the beginning of the exponential growth phase. For all  
413 assays, cultures were established in triplicate with the same inoculum without NI  
414 amendment. Upon inoculation all liquid batch cultures were sampled at regular time  
415 intervals to determine the effect of NIs on the activity and growth of AO by measuring  
416 changes in nitrite concentrations, and *amoA* or *nxB* gene abundance for AO and NOB  
417 populations, respectively.

418           **Nitrite measurements and gene abundance quantification.** Nitrite  
419 concentrations were determined colorimetrically at 540 nm in a 96-well plate format assay  
420 by diazotizing and coupling with Griess reagent (65). *amoA* and *nxB* gene abundance was  
421 determined in a Biorad CFX Real-Time PCR system. DNA was extracted from a cell pellet  
422 obtained from 2-ml aliquots of the microbial cultures using the tissue DNA extraction kit  
423 (Macherey-Nagel, Germany). The *amoA* genes of AOB and AOA was amplified with  
424 primers *amoA*-1F/*amoA*-2R (66) and Arch-*amoA*F/Arch-*amoA*R (67), respectively as  
425 described by Rousidou *et al.*, (68). The *nxB* gene of *Nitrobacter* was quantified with

426 primers *nxB-1F* and *nxB-1R* (69) using the following thermal cycling conditions: 95°C  
427 for 3 min, followed by 40 cycles of 95°C for 30 seconds, 57°C for 20 seconds, 72°C for 30  
428 seconds, with a final dissociation curve analysis. The abundance of *amoA* and *nxB* genes  
429 were determined via external standard curves as described by Rousidou *et al.*, (68). qPCR  
430 amplification efficiencies ranged from 80.3% to 109.4%, with  $r^2$  values  $\geq 0.98$ .

431 **Nitrification Inhibitors extraction.** EQ, QI, EQNL, and NP residues were  
432 extracted from liquid media by mixing 0.3 mL liquid culture with 0.7 mL of acetonitrile.  
433 Residues of DCD and DMMP were extracted by mixing 0.1 mL liquid culture with 0.9 mL  
434 of ddH<sub>2</sub>O water and methanol, respectively. The derived mixtures were vortexed for 30 s  
435 and stored at -20°C until analysis. Recovery tests at three concentration levels (in the range  
436 of the tested concentrations) showed recoveries of >80% for all compounds studied.

437 **Chromatographic analyses.** High performance liquid chromatography (HPLC)  
438 analyses were performed in a Shimadzu LC-20ADHPLC system equipped with an UV/VIS  
439 PDA detector. A Shimadzu GVP-ODs (4.6 mm by 150mm, 5 $\mu$ m) pre-column, connected  
440 to a RP Shimadzu VP-ODs (4.6 mm x 150 mm, 5 $\mu$ m) column, was used for NI separation.  
441 The injection volume was 20  $\mu$ l. The flow rate of the mobile phase was set at 0.8 mL min<sup>-1</sup>  
442 for DCD, and at 1 mL min<sup>-1</sup> for all other NIs. Column temperature was set at 40°C for  
443 DCD and DMPP, and at 25°C for all the other NIs. Mixtures of acetonitrile and ammonia  
444 (0.25% [vol/vol]) or *ortho*-phosphoric acid (0.1% [vol/vol]) were used at a ratio of 70:30  
445 (vol/vol) for mobile phases in the analyses of EQ, QI, EQNL, and NP, respectively, and  
446 detection was achieved at 225, 245, 230, and 269 nm, respectively. Similarly,  
447 chromatographic separation of DCD and DMPP was achieved using ddH<sub>2</sub>O (100%) and a

448 mixture of methanol and *ortho*-phosphoric acid (0.1% [vol/vol]) solution 50:50 by volume,  
449 respectively. DCD and DMPP residues were detected at 218 nm and 225 nm, respectively.

450       **Calculation of inhibition threshold levels (EC<sub>50</sub>).** In this study, EC<sub>50</sub> describes  
451 the concentration of the inhibitor that reduces half of the activity (nitrite accumulation or  
452 consumption) of AO or NOB, with dose-response modeling performed using normalized  
453 data whereby nitrite concentration values were divided by the mean value of the matching  
454 control. Analyses were carried out using the dose response curves (drc) v3.0-1 package  
455 (70) of the R software (71). A brief description of the tested models can be found in Ritz  
456 *et al.*, (72). An empirical modeling approach was initially used for selecting the best fitting  
457 model according to tested goodness of fit indices (see Supplemental Material), followed by  
458 the choice of the four-parameter log logistic model as the best compromise among tested  
459 models for comparing endpoint values.

460       **Data analysis.** Nitrite and qPCR data were subjected to one-way ANOVA,  
461 followed by Tukey's post hoc test ( $P < 0.05$ ). Variance between the EC<sub>50</sub> values of the  
462 different NIs for one strain and between different strains for a given NI was analyzed by  
463 one-way ANOVA, and Duncan post hoc test ( $P < 0.05$ ). The four kinetic models proposed  
464 by the FOCUS working group on pesticide degradation kinetics (73) (SFO and the biphasic  
465 models hockey stick (HS), first order multi-compartment (FOMC), and double first order  
466 in parallel (DFOP)) were used to calculate NI degradation kinetic parameters (DT<sub>50</sub>, k<sub>deg</sub>).  
467 Curve fitting was performed with the mkin v0.9.47.1 (74) package of the R v3.4.3 software  
468 (71). More details on degradation kinetics are given in the Supplemental Material.

469

470 **ACKNOWLEDGMENTS**

471 This work is part of the project “NITRIC – Looking up for **Novel nITRification Inhibitors:**  
472 **New stories with old Compounds**” which has received funding from the Hellenic  
473 Foundation for Research and Innovation (HFRI) and the General Secretariat for Research  
474 and Technology (GSRT), under grant agreement No. 1229.

475 The authors declare no conflict of interest.

476

## 477 **REFERENCES**

- 478 1. Fowler D, Coyle M, Skiba U, Sutton MA, Cape JN, Reis S, Sheppard LJ, Jenkins A,  
479 Grizzetti B, Galloway JN, Vitousek P, Leach A, Bouwman AF, Butterbach-Bahl K,  
480 Dentener F, Stevenson D, Amann M, Voss M. 2018. The global nitrogen cycle in the  
481 twenty first century. *Phil Trans R Soc B* 368: 20130164.
- 482 2. Raun WR, Johnson GV. 1999. Improving nitrogen use efficiency for cereal production.  
483 *Agronomy J* 9: 357-363.
- 484 3. Abbasi MK, Adams WA. 1998. Loss of nitrogen in compacted grassland soil by  
485 simultaneous nitrification and denitrification. *Plant Soil* 200: 265–277.
- 486 4. Moir JL, Cameron KC, Di HJ. 2007. Effects of the nitrification inhibitor  
487 dicyandiamide on soil mineral N, pasture yield, nutrient uptake and pasture quality in  
488 a grazed pasture system. *Soil Use Manag* 23: 111-120.
- 489 5. McCarty GW. 1999. Modes of action of nitrification inhibitors. *Biol Fertil Soils*  
490 29:1–9.
- 491 6. Goring CAI. 1962. Control of nitrification of ammonium fertilizers and urea by 2-  
492 chloro-6-(trichloromethyl)-pyridine. *Soil Sci* 93: 211–218.

- 493 7. Solansky S. 1982. N-Stabilisator SKW-DIDIN verbessert die Stickstoffwirkung der  
494 Gülle. Blickfeld 61:1–4.
- 495 8. Zerulla W, Barth T, Dressel J, Erhardt K, von Locquenghien KH, Pasda G, Rädle M,  
496 Wissemeyer AH. 2001. 3,4-Dimethylpyrazole phosphate (DMPP) – A new nitrification  
497 inhibitor for agriculture and horticulture – An introduction. Biol Fertil Soils 34: 79–  
498 84.
- 499 9. Ruser R, Schulz R. 2015. The effect of nitrification inhibitors on the nitrous oxide  
500 (N<sub>2</sub>O) release from agricultural soils — a review. J Plant Nutr Soil Sci 178:171-188.
- 501 10. Vannelli T, Hooper AB. 1992. Oxidation of nitrapyrin to 6- chloropicolinic acid by the  
502 ammonia-oxidizing bacterium *Nitrosomonas europaea*. Appl Environ Microbiol 58:  
503 2321-2325.
- 504 11. Subbarao GV, Ito O, Sahrawat KL, Berry WL, Nakahara K, Ishikawa T, Watanabe T,  
505 Suenaga K, Rondon M, Rao IM. 2006. Scope and Strategies for Regulation of  
506 Nitrification in Agricultural Systems - Challenges and Opportunities. Crit Rev Plant  
507 Sci 25:303–335.
- 508 12. Coskun D, Britto DT, Shi W, Kronzucker, HJ. 2017. Nitrogen transformations in  
509 modern agriculture and the role of biological nitrification inhibition. Nat Plants  
510 3:17074.
- 511 13. Beeckman F, Motte H, Beeckman T. 2018. Nitrification in agricultural soils: impact,  
512 actors and mitigation. Curr Opin Biotechnol 50: 166–173.
- 513 14. Könneke M, Bernhard AE, de la Torre JR, Walker CB, Waterbury JB, Stahl DA. 2005.  
514 Isolation of an autotrophic ammonia- oxidizing marine archaeon. Nature 437:543-546.

- 515 15. Tourna M, Stieglmeier M, Spang A, Könneke M, Schintlmeister A, Urich T, Engel M,  
516 Schloter M, Wagner M, Richter A, Schleper C. 2011. *Nitrososphaera viennensis*, an  
517 ammonia oxidizing archaeon from soil. Proc Natl Acad Sci U S A 108:8420-8425.
- 518 16. Daims H, Lebedeva EV, Pjevac P, Han P, Herbold C, Albertsen M, Jehmlich N,  
519 Palatinszky M, Vierheilig J, Bulaev A, Kirkegaard RH, von Bergen M, Rattei T, van  
520 Kessel MAHJ, Speth DR, Albertsen M, Nielsen PH, Op den Camp HJM, Kartal B,  
521 17. van Kessel MAHJ, Speth DR, Albertsen M, Nielsen PH, Huub JM, Op den Camp  
522 HJM, Kartal B, Jetten MSM, Lucker S. 2015. Complete nitrification by a single  
523 microorganism. Nature 528:555-559.
- 524 18. Belser LW, Schmidt EL. 1981. Inhibitory effect of nitrapyrin and the three genera of  
525 ammonia-oxidizing nitrifiers. Appl Environ Microb 41: 819–821.
- 526 19. Jones RD, Morita RY, Griffiths RP. 1984. Method for estimating chemolithotrophic  
527 ammonium oxidation using carbon monoxide oxidation. Mar Ecol Prog Ser 17: 259-  
528 269.
- 529 20. Matsuba D, Takazaki H, Sato Y, Takahashi R, Tokuyama T, Wakabayashi K. 2003.  
530 Susceptibility of Ammonia-Oxidizing Bacteria to Nitrification Inhibitors. Z  
531 Naturforsch 58c: 282-287.
- 532 21. Liu Y, Yang Y, Qin H-L, Zhu Y-J, Wei W-X. 2014. Differential responses of nitrifier  
533 and denitrifier to dicyandiamide in short- and long-term intensive vegetable cultivation  
534 soils. J Integr Agric 13: 1090-1098.
- 535 22. Lehtovirta-Morley LE, Verhamme DT, Nicol GW, Prosser JI. 2013. Effect of  
536 nitrification inhibitors on the growth and activity of *Nitrosotalea devanattera* in  
537 culture and soil. Soil Biol Biochem 62:129-133.



- 538 23. Shen T, Stieglmeier M, Dai J, Ulrich T, Schleper C. 2013. Responses of the terrestrial  
539 ammonia-oxidizing archaeon *Ca. Nitrososphaera viennensis* and the ammonia-  
540 oxidizing bacterium *Nitrosospora multiformis* to nitrification inhibitors. FEMS  
541 Microbiol Lett 344:121-129.
- 542 24. Di HJ, Cameron KC, Shen JP, Winefield CS, O’Callaghan M, Bowatte S, He JZ. 2010.  
543 Ammonia-oxidizing bacteria and archaea grow under contrasting soil nitrogen  
544 conditions. FEMS Microb Ecol 72: 386–394.
- 545 25. Di HJ, Cameron KC. 2011. Inhibition of ammonium oxidation by a liquid formulation  
546 of 3,4-dimethylpyrazole phosphate (DMPP) compared with a dicyandiamide (DCD)  
547 solution in six New Zealand grazed grassland soils. J Soil Sediment 11: 1032–1039.
- 548 26. Kleineidam K, Kôsmrlj K, Kublik S, Palmer I, Pfab H, Ruser R, Fiedler S, Schloter  
549 M. 2011. Influence of the nitrification inhibitor 3,4-dimethylpyrazole phosphate  
550 (DMPP) on ammonia-oxidizing bacteria and archaea in rhizosphere and bulk soil.  
551 Chemosphere 84 : 182–186.
- 552 27. Cui P, Fan F, Yin C, Li Z, Song A, Wan Y, Liang Y. 2013. Urea- and nitrapyrin-  
553 affected N<sub>2</sub>O emission is coupled mainly with ammonia oxidizing bacteria growth in  
554 microcosms of three typical Chinese arable soils. Soil Biol Biochem 66: 214-221.
- 555 28. Florio A, Clark IM, Hirsch PR, Jhurrea D, Benedetti A. 2014. Effects of the  
556 nitrification inhibitor 3,4-dimethylpyrazole phosphate (DMPP) on abundance and  
557 activity of ammonia oxidizers in soil. Biol Fertil Soils 50:795–807.
- 558 29. Yang W, Wang Y, Tago K, Tokuda S, Hayatsu M. 2017. Comparison of the Effects of  
559 Phenylhydrazine Hydrochloride and Dicyandiamide on Ammonia-Oxidizing Bacteria  
560 and Archaea in Andosols. Front Microbiol 8:2226

- 561 30. Prosser JI, Nicol GW. 2012. Archaeal and bacterial ammonia-oxidisers in soil: the  
562 quest for niche specialisation and differentiation. *Trends Microbiol* 20: 523-531.
- 563 31. Kits KD, Sedlacek CJ, Lebedeva EV, Han P, Bulaev A, Pjevac P, Daebeler A,  
564 Romano S, Albertsen M, Stein LY, Daims H, Wagner M. 2017. Kinetic analysis of a  
565 complete nitrifier reveals an oligotrophic lifestyle. *Nature* 549: 269-272.
- 566 32. Papadopoulou ES, Tsachidou B, Sułowicz S, Menkissoglu-Spiroudi U, Karpouzas  
567 DG. 2016. Land spreading of wastewaters from the fruit packaging industry and  
568 potential effects on soil microbes: effects of the antioxidant ethoxyquin and its  
569 metabolites on ammonia oxidizers. *Appl Environ Microbiol* 82: 747–755.
- 570 33. Karas P, Metsoviti A, Zisis V, Ehaliotis C, Omirou M, Papadopoulou E,  
571 Menkissoglou-Spiroudi U, Manta S, Komiotis D, Karpouzas DG. 2015. Dissipation,  
572 metabolism and sorption of pesticides used in fruit-packaging plants: towards an  
573 optimized depuration of their pesticide-contaminated agro-industrial effluents. *Sci*  
574 *Total Environ* 530–531: 129–139.
- 575 34. Kozłowski JA, Stieglmeier M, Schleper C, Klotz MG, Stein LY. 2016. Pathways and  
576 key intermediates required for obligate aerobic ammonia-dependent chemolithotrophy  
577 in bacteria and *Thaumarchaeota*. *ISME J* 10: 1836–1845.
- 578 35. Alves RJE, Minh BQ, Urich T, von Haeseler A, Schleper C. 2018. Unifying the global  
579 phylogeny and environmental distribution of ammonia-oxidising archaea based on  
580 *amoA* genes. *Nat Commun* 9:1517.
- 581 36. Daims H, Lückner S, Wagner M. 2016. A New Perspective on Microbes Formerly  
582 Known as Nitrite-Oxidizing Bacteria. *Trends Microbiol* 24: 699-712.

- 583 37. Purkhold U, Pommerening-Röser A, Juretschko S, Schmid MC, Koops HP, Wagner  
584 M. 2000. Phylogeny of All Recognized Species of Ammonia Oxidizers Based on  
585 Comparative 16S rRNA and amoA Sequence Analysis: Implications for Molecular  
586 Diversity Surveys. *Appl Environ Microbiol* 66: 5368–5382.
- 587 38. Kowalchuk GA, Stephen JR. 2001. Ammonia-Oxidizing Bacteria: A Model for  
588 Molecular Microbial Ecology. *Annu Rev Microbiol* 55:485–529.
- 589 39. Norton JM. 2011. Diversity and environmental distribution of ammonia-oxidizing  
590 bacteria. In *Nitrification*, Ward BB, Arp DJ, Klotz MG. ASM Press, Washington, DC,  
591 pp. 39-57.
- 592 40. Lehtovirta-Morley LE, Ross J, Hink L, Weber EB, Gubry-Rangin C, Thion C, Prosser  
593 JI, Nicol GW. 2016. Isolation of “*Candidatus Nitrosocosmicus franklandus*,” a novel  
594 ureolytic soil archaeal ammonia oxidiser with tolerance to high ammonia  
595 concentration. *FEMS Microbiol Ecol* 92: fiw057.
- 596 41. Lehtovirta-Morley LE, Ge C, Ross J, Yao H, Nicol GW, Prosser JI. 2014.  
597 Characterisation of terrestrial acidophilic archaeal ammonia oxidisers and their  
598 inhibition and stimulation by organic compounds. *FEMS Microbiol Ecol* 89: 542–552.
- 599 42. Herbold CW, Lehtovirta-Morley LE, Jung MY, Jehmlich N, Hausmann B, Han P, Loy  
600 A, Pester M, Sayavedra-Soto LA, Rhee S-K, Prosser JI, Nicol GW, Wagner M, Gubry-  
601 Rangin C. (2017) Ammonia-oxidising archaea living at low pH: insights from  
602 comparative genomics. *Environ Microbiol* 19: 4939–4952.
- 603 43. De Boer, W, Klein Gunnewiek PGA, Veenhuis LM, Bock E, Laanbroek HJ. 1991.  
604 Nitrification at Low pH by Aggregated Chemolithotrophic Bacteria. *Appl Environ*  
605 *Microbiol* 57: 3600-3604

- 606 44. Xia W, Zhang C, Zeng X, Feng Y, Weng J, Lin X, Zhu J, Xiong Z, Xu J, Cai Z, Jia Z.  
607 2011. Autotrophic growth of nitrifying community in an agricultural soil. *ISME J* 5:  
608 1226–1236.
- 609 45. Nowka B, Daims H, Spieck E. 2015. Comparison of Oxidation Kinetics of Nitrite-  
610 Oxidizing Bacteria: Nitrite Availability as a Key Factor in Niche Differentiation. *Appl*  
611 *Environ Microbiol* 81: 745–753.
- 612 46. Błaszczuk AB, Augustyniak A, Skolimowski J. 2013. Ethoxyquin: an antioxidant used  
613 in animal feed. *Int J Food Sci* 2013:585931.
- 614 47. O’Callaghan M, Gerard EM, Carter PE, Lardner R, Sarathchandra U, Burch G, Ghani  
615 A, Bell N. 2010. Effect of the nitrification inhibitor dicyandiamide (DCD) on microbial  
616 communities in a pasture soil amended with bovine urine. *Soil Biol Biochem* 42:1425-  
617 1436.
- 618 48. Di HJ, Cameron KC, Podolyan A, Robinson A. 2014. Effect of soil moisture status  
619 and a nitrification inhibitor, dicyandiamide, on ammonia oxidizer and denitrifier  
620 growth and nitrous oxide emissions in a grassland soil. *Soil Biol Biochem* 73: 59- 68.
- 621 49. Fu Q, Clark IM, Zhu J, Hu H, Hirsch PR. 2018. The short-term effects of nitrification  
622 inhibitors on the abundance and expression of ammonia and nitrite oxidizers in a long-  
623 term field experiment comparing land management. *Biol Fertil Soils* 54:163–172.
- 624 50. Jung M-Y, Park S-J, Min D, Kim J-S, Rijpstra WIC, Damste JSS, Kim G-J, Madsen  
625 EL, Rhee S-K. 2011. Enrichment and Characterization of an Autotrophic Ammonia-  
626 Oxidizing Archaeon of Mesophilic Crenarchaeal Group I.1a from an Agricultural Soil.  
627 *Appl Environ Microbiol* 77: 8635–8647.

- 628 51. Kim J-G, Jung M-Y, Park S-J, Rijpstra WIC, Damsté JSS, Madsen EL, Min D, Kim J-  
629 S, Kim G-J, Rhee S-K. 2012. Cultivation of a highly enriched ammonia-oxidizing  
630 archaeon of thaumarchaeotal group I.1b from an agricultural soil. *Environ Microbiol*  
631 14:1528–1543.
- 632 52. Shi X, Hu H-W, Möller C, He J-Z, Chen D, Suter HC. 2016. Effects of the Nitrification  
633 Inhibitor 3,4-Dimethylpyrazole Phosphate on Nitrification and Nitrifiers in Two  
634 Contrasting Agricultural Soils. *Appl Environ Microb* 82: 5236-5248.
- 635 53. Torralbo F, Menéndez S, Barrena I, Estavillo J.M, Marino D, González-Murua C.  
636 2017. Dimethyl pyrazol-based nitrification inhibitors effect on nitrifying and  
637 denitrifying bacteria to mitigate N<sub>2</sub>O emission. *Sci Rep* 7:13810.
- 638 54. Zhang M, Wang W, Bai SH, Zhou X, Teng Y, Xu Z. 2018. Antagonistic effects of  
639 nitrification inhibitor 3,4-dimethylpyrazole phosphate and fungicide iprodione on net  
640 nitrification in an agricultural soil. *Soil Biol Biochem* 116:167-170.
- 641 55. Vilas MP, Verburg K, Thorburn, PJ, Probert ME, Bonnett GD. 2019. A framework for  
642 analysing nitrification inhibition: A case study on 3,4-dimethylpyrazole phosphate  
643 (DMPP). *Sci Total Environ* 672 : 846–854.
- 644 56. Jung M-Y, Park S-J, Min D, Kim J-S, Rijpstra WIC, Damste' JSS, Kim G-J, Madsen  
645 EL, Rhee S-K. (2011). Enrichment and characterization of an autotrophic ammonia-  
646 oxidizing archaeon of mesophilic crenarchaeal group I.1a from an agricultural soil.  
647 *Appl Environ Microbiol* 77: 8635-8647.
- 648 57. Martens-Habbena W, Qin W, Horak RE, Urakawa H, Schauer AJ, Moffett JW,  
649 Armbrust EV, Ingalls AE, Devol AH, Stahl DA. 2015. The production of nitric oxide  
650 by marine ammonia-oxidizing archaea and inhibition of archaeal ammonia oxidation  
651 by a nitric oxide scavenger. *Environ Microbiol* 17: 2261–74.

- 652 58. Fabian C, Reimann C, Fabian K, Birke M, Baritz R, Haslinger E, The GEMAS Project  
653 Team. 2014. GEMAS: Spatial distribution of the pH of European agricultural and  
654 grazing land soil. *Appl Geochem* 48: 207-216.
- 655 59. Walker CB, de la Torre JR, Klotz MG, Urakawa H, Pinel N, Arp DJ, Brochier-  
656 Armanet C, Chain PS, Chan PP, Gollabgir A, Hemp J, Hügler M, Karr EA, Könneke  
657 M, Shin M, Lawton TJ, Lowe T, Martens-Habbena W, Sayavedra-Soto LA, Lang  
658 D, Sievert SM, Rosenzweig AC, Manning G, Stahl DA. 2010. *Nitrosopumilus*  
659 *maritimus* genome reveals unique mechanisms for nitrification and autotrophy in  
660 globally distributed marine crenarchaea. *Proc Natl Acad Sci USA* 107: 8818-8823.
- 661 60. Kim J-G, Jung M-Y, Park S-J, Damsté JSS, Schouten S, Rijpstra WIC, Jung M-Y,  
662 Kim S-J, Gwak J-H, Hong H, Si O-J, Lee S, Madsen EL, Rhee S-K. 2016. Hydrogen  
663 peroxide detoxification is a key mechanism for growth of ammonia-oxidizing archaea.  
664 *Proc Natl Acad Sci USA* 113: 7888–7893.
- 665 61. Clough TJ, Ray JL, Buckthought LE, Calder J, Baird D, O’Callaghan, Sherlock RR,  
666 Condron LM. 2009. The mitigation potential of hippuric acid on N<sub>2</sub>O emissions from  
667 urine patches: An in-situ determination of its effect. *Soil Biol Biochem* 41: 2222–2229.
- 668 62. Carneiro J, Cardenas ZLM, Hatch DJ, Trindade H, Scholefield D, Clegg CD, Hobbs  
669 P. 2010. Effect of the nitrification inhibitor dicyandiamide on microbial communities  
670 and N<sub>2</sub>O from an arable soil fertilized with ammonium sulphate. *Environ Chem Lett*  
671 8: 237–246.
- 672 63. Shah AG, Pierson JA, Pavlostathis SG. 2005. Fate and effect of the antioxidant  
673 ethoxyquin on a mixed methanogenic culture. *Water Res* 39: 4251–4263.
- 674 64. Thorisson S, Gunstone FD, Hard R. 1992. Some oxidation products of ethoxyquin  
675 including those found in autoxidising systems. *Chem Phys Lipids* 60:263–271.

- 676 65. Shinn MB. 1941. Colorimetric method for determination of nitrite. *Ind Eng Chem* 13:  
677 33–35.
- 678 66. Rotthauwe JH, Witzel KP, Liesack W. 1997. The ammonia monooxygenase structural  
679 gene *amoA* as a functional marker: molecular fine-scale analysis of natural ammonia-  
680 oxidizing populations. *Appl Environ Microbiol* 63:4704–4712.
- 681 67. Francis CA, Roberts KJ, Beman JM, Santoro AE, Oakley BB. 2005. Ubiquity and  
682 diversity of ammonia-oxidizing archaea in water column sand sediments of the ocean.  
683 *Proc Natl Acad Sci U S A* 102:14683–14688.
- 684 68. Rousidou C, Papadopoulou E, Kortsinidou M, Giannakou IO, Singh BK,  
685 Menkissoglu-Spirodi U, Karpouzas DG. 2013. Bio-pesticides: harmful or harmless to  
686 ammonia oxidizing microorganisms? The case of a *Paecilomyces lilacinus*-based  
687 nematicide. *Soil Biol Biochem* 67:98–105.
- 688 69. Vanparys B, Spieck E, Heylena K, Wittebollec L, Geetsc J, Boonc N, De Vosa P.  
689 2007. The phylogeny of the genus *Nitrobacter* based on comparative rep-PCR, 16S  
690 rRNA and nitrite oxidoreductase gene sequence analysis. *Syst Appl Microbiol* 30:  
691 297–308.
- 692 70. Ritz C, and Streibig JC. 2005. Bioassay Analysis using R. *Journal of Statistical*  
693 *Software* 12.
- 694 71. R Core Team. 2017. R: A language and environment for statistical computing,  
695 reference index version 3.4.3. 2017. <http://www.R-project.org>.
- 696 72. Ritz C, Baty F, Streibig JC, Gerhard D. 2016. Dose-response analysis using R. *PLoS*  
697 *ONE* 10: e0146021.
- 698 73. FOCUS. 2006. Guidance Document on Estimating Persistence and Degradation  
699 Kinetics from Environmental Fate Studies on Pesticides in EU Registration. Report of

700 the FOCUS Work Group on Degradation Kinetics, EC Document Reference  
701 Sanco/10058/2005 Version, 2.0, 2006, p. 434.

702 74. Ranke J. 2018. mkin: Kinetic Evaluation of Chemical Degradation Data. R package  
703 version 0.9.47.1. <https://CRAN.R-project.org/package=mkin>.

704

## 705 TABLES

706 **Table 1.** Mean EC<sub>50</sub> values (μM) of the tested nitrification inhibitors (NIs) on ammonia or  
707 nitrite oxidation activity of the nitrifying strains. Standard errors of the mean values are  
708 given in brackets. Upper case letters indicate significant differences (p<0.05) between  
709 microorganisms for each individual NI, and lower-case letters indicate significant  
710 differences (p<0.05) between NIs for each tested microorganism.

711 **Table 2.** Mean concentrations ± standard errors (μM) of Quinone Imine (QI) and  
712 Ethoxyquinoline (EQNL) formed in the liquid cultures of the nitrifying isolates amended  
713 with Ethoxyquin (EQ) (i) at the onset of inhibition, (ii) at the time when maximum  
714 concentration levels were detected. The timepoint (days) at which each measurement was  
715 taken is given in brackets.

716

## 717 FIGURE LEGENDS

718 **Fig. 1.** The effect of different concentrations of Ethoxyquin (EQ) (a), Quinone Imine (QI)  
719 (b), Ethoxyquinoline (EQNL) (c), Dicyandiamide (DCD) (d), Nitrapyrin (NP) (e), and  
720 DMPP (f), on nitrite production by *Nitrosomonas europaea*. Error bars represent the



721 standard error of the mean of triplicate cultures. Arrows indicate the time point when the  
722 nitrification inhibitor (NI) was added.

723 **Fig. 2.** The effect of different concentrations of Ethoxyquin (EQ) (a), Quinone Imine (QI)  
724 (b), Ethoxyquinoline (EQNL) (c), Dicyandiamide (DCD) (d), Nitrapyrin (NP) (e), and  
725 DMPP (f) on nitrite production by *Nitrosospira multiformis*. Error bars represent the  
726 standard error of the mean of triplicate cultures. Arrows indicate the time point when the  
727 nitrification inhibitor (NI) was added.

728 **Fig. 3.** The effect of different concentrations of Ethoxyquin (EQ) (a), Quinone Imine (QI)  
729 (b), Ethoxyquinoline (EQNL) (c), Dicyandiamide (DCD) (d), Nitrapyrin (NP) (e), and  
730 DMPP (f) on nitrite production by “*Candidatus Nitrosocosmicus franklandus*”. Error bars  
731 represent the standard error of the mean from triplicate cultures. Arrows indicate the time  
732 point when the nitrification inhibitor (NI) was added.

733 **Fig. 4.** The effect of different concentrations of Ethoxyquin (EQ) (a), Quinone Imine (QI)  
734 (b), Ethoxyquinoline (EQNL) (c), Dicyandiamide (DCD) (d), Nitrapyrin (NP) (e), and  
735 DMPP (f) on nitrite production by “*Candidatus Nitrosotalea sinensis*”. Error bars represent  
736 the standard error of the mean of triplicate cultures. Arrows indicate the time point when  
737 the nitrification inhibitor (NI) was added.

738 **Fig. 5.** The effect of different concentrations of Ethoxyquin (EQ) (a), Quinone Imine (QI)  
739 (b), Ethoxyquinoline (EQNL) (c), Dicyandiamide (DCD) (d), Nitrapyrin (NP) (e), and  
740 DMPP (f) on nitrite transformation by *Nitrobacter* sp. Error bars represent the standard  
741 error of the mean from triplicate cultures. Arrows indicate the time at which the nitrification  
742 inhibitor (NI) was added.

743 **Fig. 6.** Heatmap representation of the qualitative impact of different concentrations of NIs  
744 on the nitrifying activity of soil ammonia- and nitrite-oxidizing isolates. The level of  
745 inhibition observed was classified in the following categories: “Inhibition” (shown in red);  
746 “Inhibition and Recovery” (shown in orange); “No inhibition” (shown in green); “Not  
747 tested” (shown in white).

**Table 1.** Mean EC<sub>50</sub> values (μM) of the tested nitrification inhibitors (NIs) to the ammonia or nitrite oxidation activity of the nitrifying strains. Standard errors of the mean values are given in brackets. Upper case letters indicate significant differences ( $p < 0.05$ ) between microorganisms regarding each tested NI and lower-case letters indicate significant differences ( $p < 0.05$ ) between NIs within each microorganism.

| Microorganisms                         | Ethoxyquin<br>(EQ)     | Quinone Imine<br>(QI)  | Ethoxyquinoline<br>(EQNL) | DCD                      | Nitrapyrin<br>(NP)     | DMPP                       |
|----------------------------------------|------------------------|------------------------|---------------------------|--------------------------|------------------------|----------------------------|
| <i>Nitrosomonas europaea</i>           | 181.4 (23.3) <b>bB</b> | 199.8 (10.8) <b>bC</b> | 543.4 (111.5) <b>cC</b>   | 221.9 (29.0) <b>bA</b>   | 2.1 (0.4) <b>aA</b>    | 2.1 (0.7) <b>aA</b>        |
| <i>Nitrospira multiformis</i>          | 214.8 (39.6) <b>bB</b> | 65.1 (6.0) <b>aB</b>   | 360.5 (105.7) <b>cB</b>   | 248.7 (7.4) <b>bcA</b>   | 0.8 (0.3) <b>aA</b>    | 0.6 (0.1) <b>aA</b>        |
| <i>Ca. Nitrosocosmicus franklandus</i> | 1.4 (0.3) <b>aA</b>    | 0.7 (0.4) <b>aA</b>    | 129.5 (25.0) <b>aA</b>    | 1568.5 (237.1) <b>bB</b> | 1.0 (0.3) <b>aA</b>    | 1773.7 (439.9) <b>bB</b>   |
| <i>Ca. Nitrosotalea sinensis</i>       | 1.0 (0.4) <b>aA</b>    | 0.3 (0.0) <b>aA</b>    | 26.6 (5.7) <b>aA</b>      | 477.8 (56.6) <b>cA</b>   | 6.7 (1.8) <b>aA</b>    | 359.5 (43.1) <b>bA</b>     |
| <i>Nitrobacter sp.</i>                 | 166.7 (53.5) <b>aB</b> | 247.2 (65.7) <b>aD</b> | 562.0 (38.5) <b>aC</b>    | >100000*                 | 167.8 (41.2) <b>aB</b> | 12581.3 (1979.2) <b>bC</b> |

\*Maximum tested concentration

**Table 2.** Mean concentrations  $\pm$  standard errors ( $\mu\text{M}$ ) of Quinone Imine (QI) and Ethoxyquinoline (EQNL) formed in the liquid cultures of the nitrifying isolates amended with Ethoxyquin (EQ) (i) at the onset of inhibition, (ii) at the time when maximum concentration levels were detected. The timepoint (days) at which each measurement was taken is given in brackets.

| Ethoxyquin treatment |                                                   | Concentration ( $\mu\text{M}$ ) |                      |                              |                      |
|----------------------|---------------------------------------------------|---------------------------------|----------------------|------------------------------|----------------------|
|                      |                                                   | Inhibition Onset                |                      | Maximum concentration formed |                      |
|                      |                                                   | QI                              | EQNL                 | QI                           | EQNL                 |
| <b>AOB</b>           | <i>N. europaea</i> - 460 $\mu\text{M}$            | 95.4 $\pm$ 2.1 (7d)             | 3.42 $\pm$ 0.2 (7d)  | 170.2 $\pm$ 1.4 (14d)        | 3.42 $\pm$ 0.2 (7d)  |
|                      | <i>N. multiformis</i> - 460 $\mu\text{M}$         | 36.6 $\pm$ 3.4 (8d)             | 8.98 $\pm$ 0.9 (8d)  | 167.6 $\pm$ 16.1 (16d)       | 10.3 $\pm$ 0.8 (14d) |
| <b>AOA</b>           | “ <i>Ca. N. franklandus</i> ” – 460 $\mu\text{M}$ | 74.9 $\pm$ 0.9 (15d)            | 8.80 $\pm$ 0.1 (15d) | 96.3 $\pm$ 1.5 (19d)         | 10.3 $\pm$ 0.2 (22d) |
|                      | “ <i>Ca. N. franklandus</i> ” – 46 $\mu\text{M}$  | 4.97 $\pm$ 0.7 (15d)            | 0.61 $\pm$ 0.3 (15d) | 6.75 $\pm$ 0.1 (25d)         | 0.61 $\pm$ 0.4 (22d) |
|                      | “ <i>Ca. N. franklandus</i> ” – 4.6 $\mu\text{M}$ | 1.78 $\pm$ 0.1 (15d)            | 0.0 (0.0)            | 1.83 $\pm$ 0.1 (16d)         | 0.0 (0.0)            |
|                      | “ <i>Ca. N. sinensis</i> ” – 460 $\mu\text{M}$    | 132.6 $\pm$ 1.5 (7d)            | 16.9 $\pm$ 0.4 (7d)  | 189.8 $\pm$ 13.8 (10d)       | 27.4 $\pm$ 1.1 (17d) |
|                      | “ <i>Ca. N. sinensis</i> ” – 46 $\mu\text{M}$     | 13.3 $\pm$ 0.4 (7d)             | 2.3 $\pm$ 0.1 (7d)   | 13.5 $\pm$ 0.7 (6d)          | 3.4 $\pm$ 1.0 (17d)  |
|                      | “ <i>Ca. N. sinensis</i> ” – 4.6 $\mu\text{M}$    | 1.0 $\pm$ 0.0 (7d)              | 0.20 $\pm$ 0.0 (7d)  | 4.3 $\pm$ 0.4 (5d)           | 0.4 $\pm$ 0.1 (27d)  |
| <b>NOB</b>           | <i>Nitrobacter</i> sp. - 460 $\mu\text{M}$        | 50.8 $\pm$ 13.1 (4d)            | 11.5 $\pm$ 0.9 (4d)  | 114.5 $\pm$ 1.8 (9d)         | 14.2 $\pm$ 0.6 (3d)  |

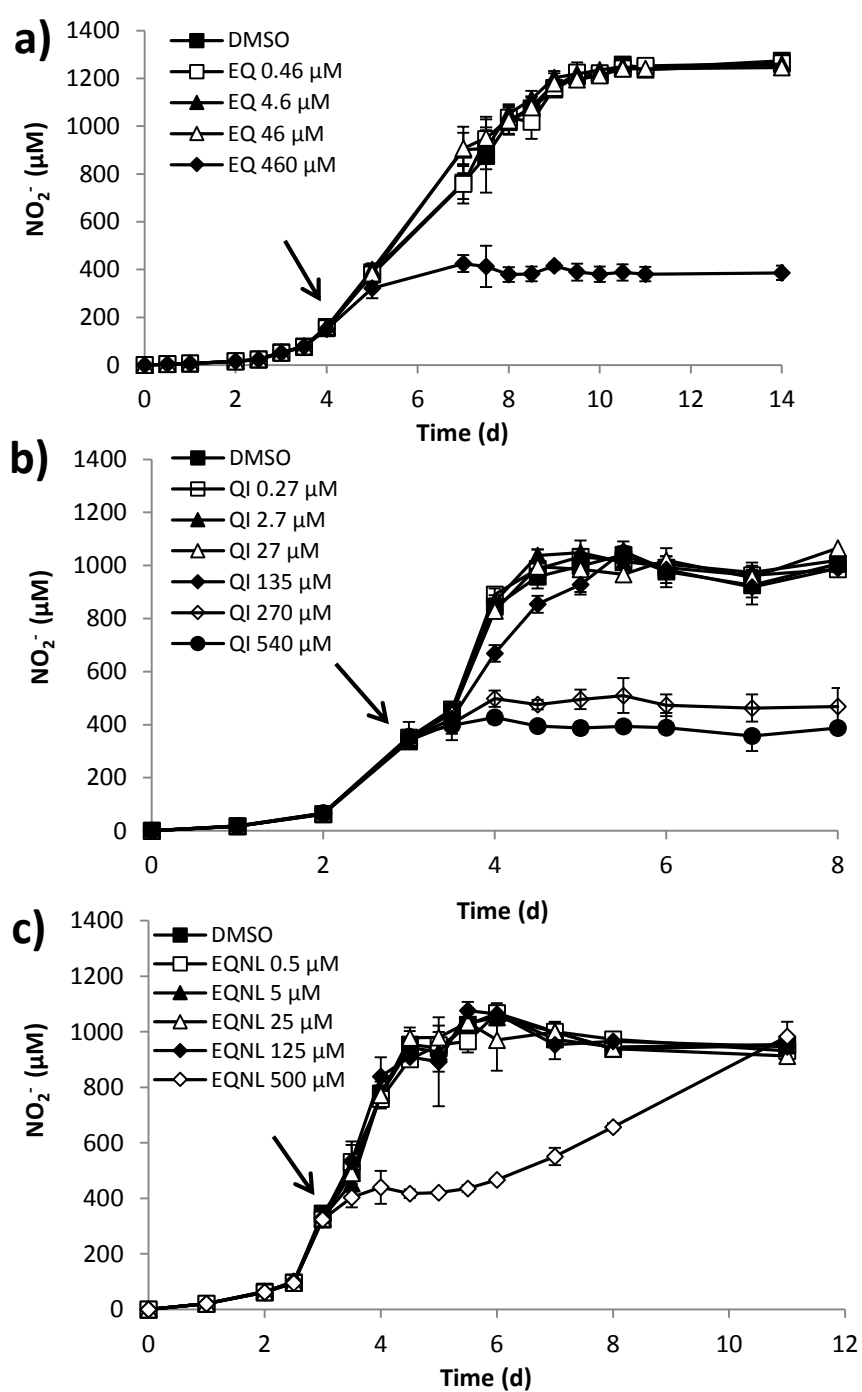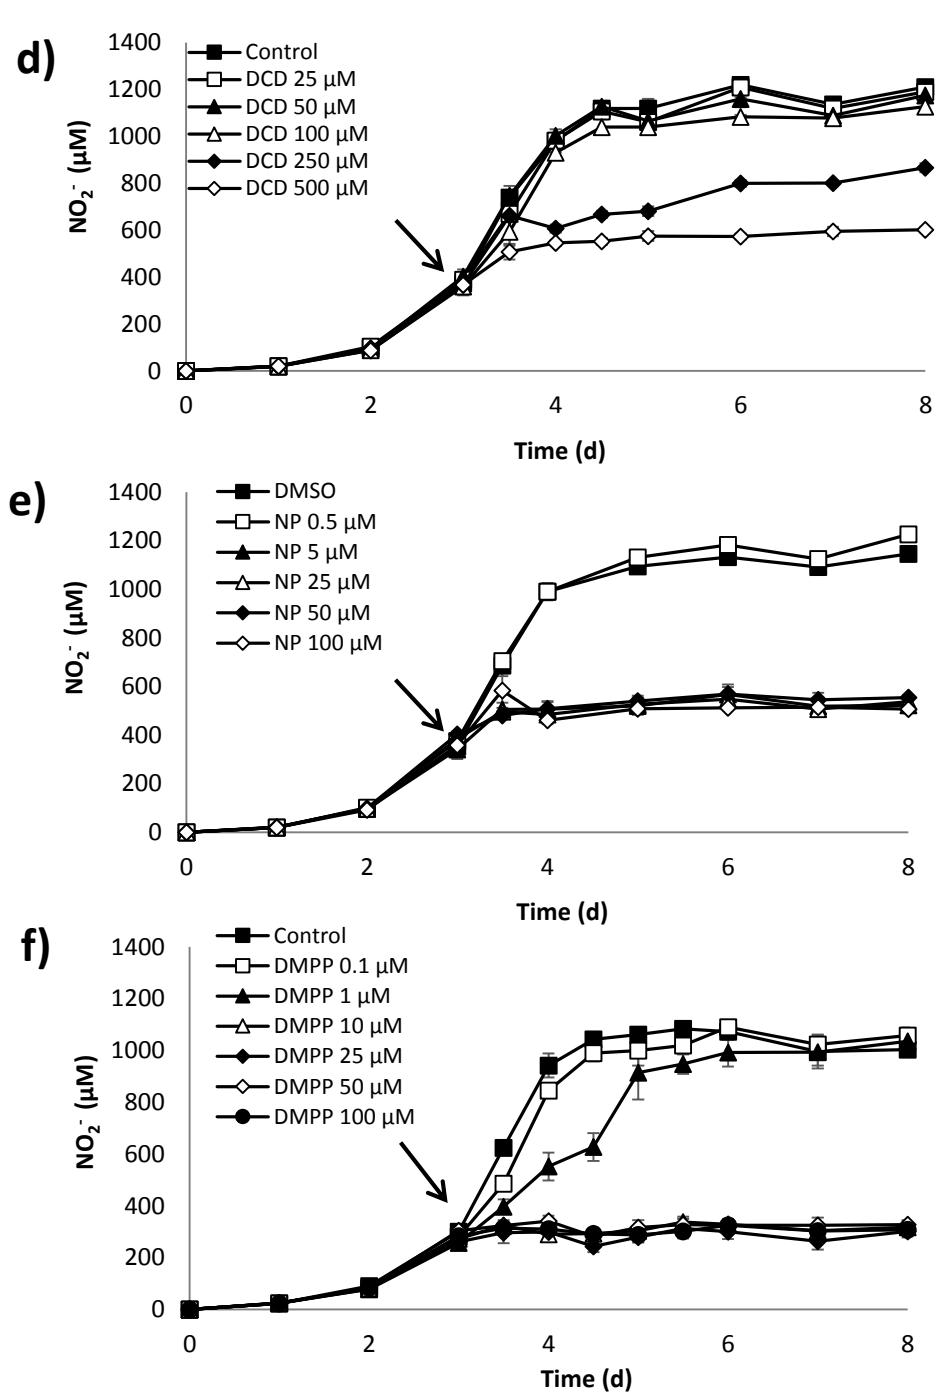

**Figure 1**

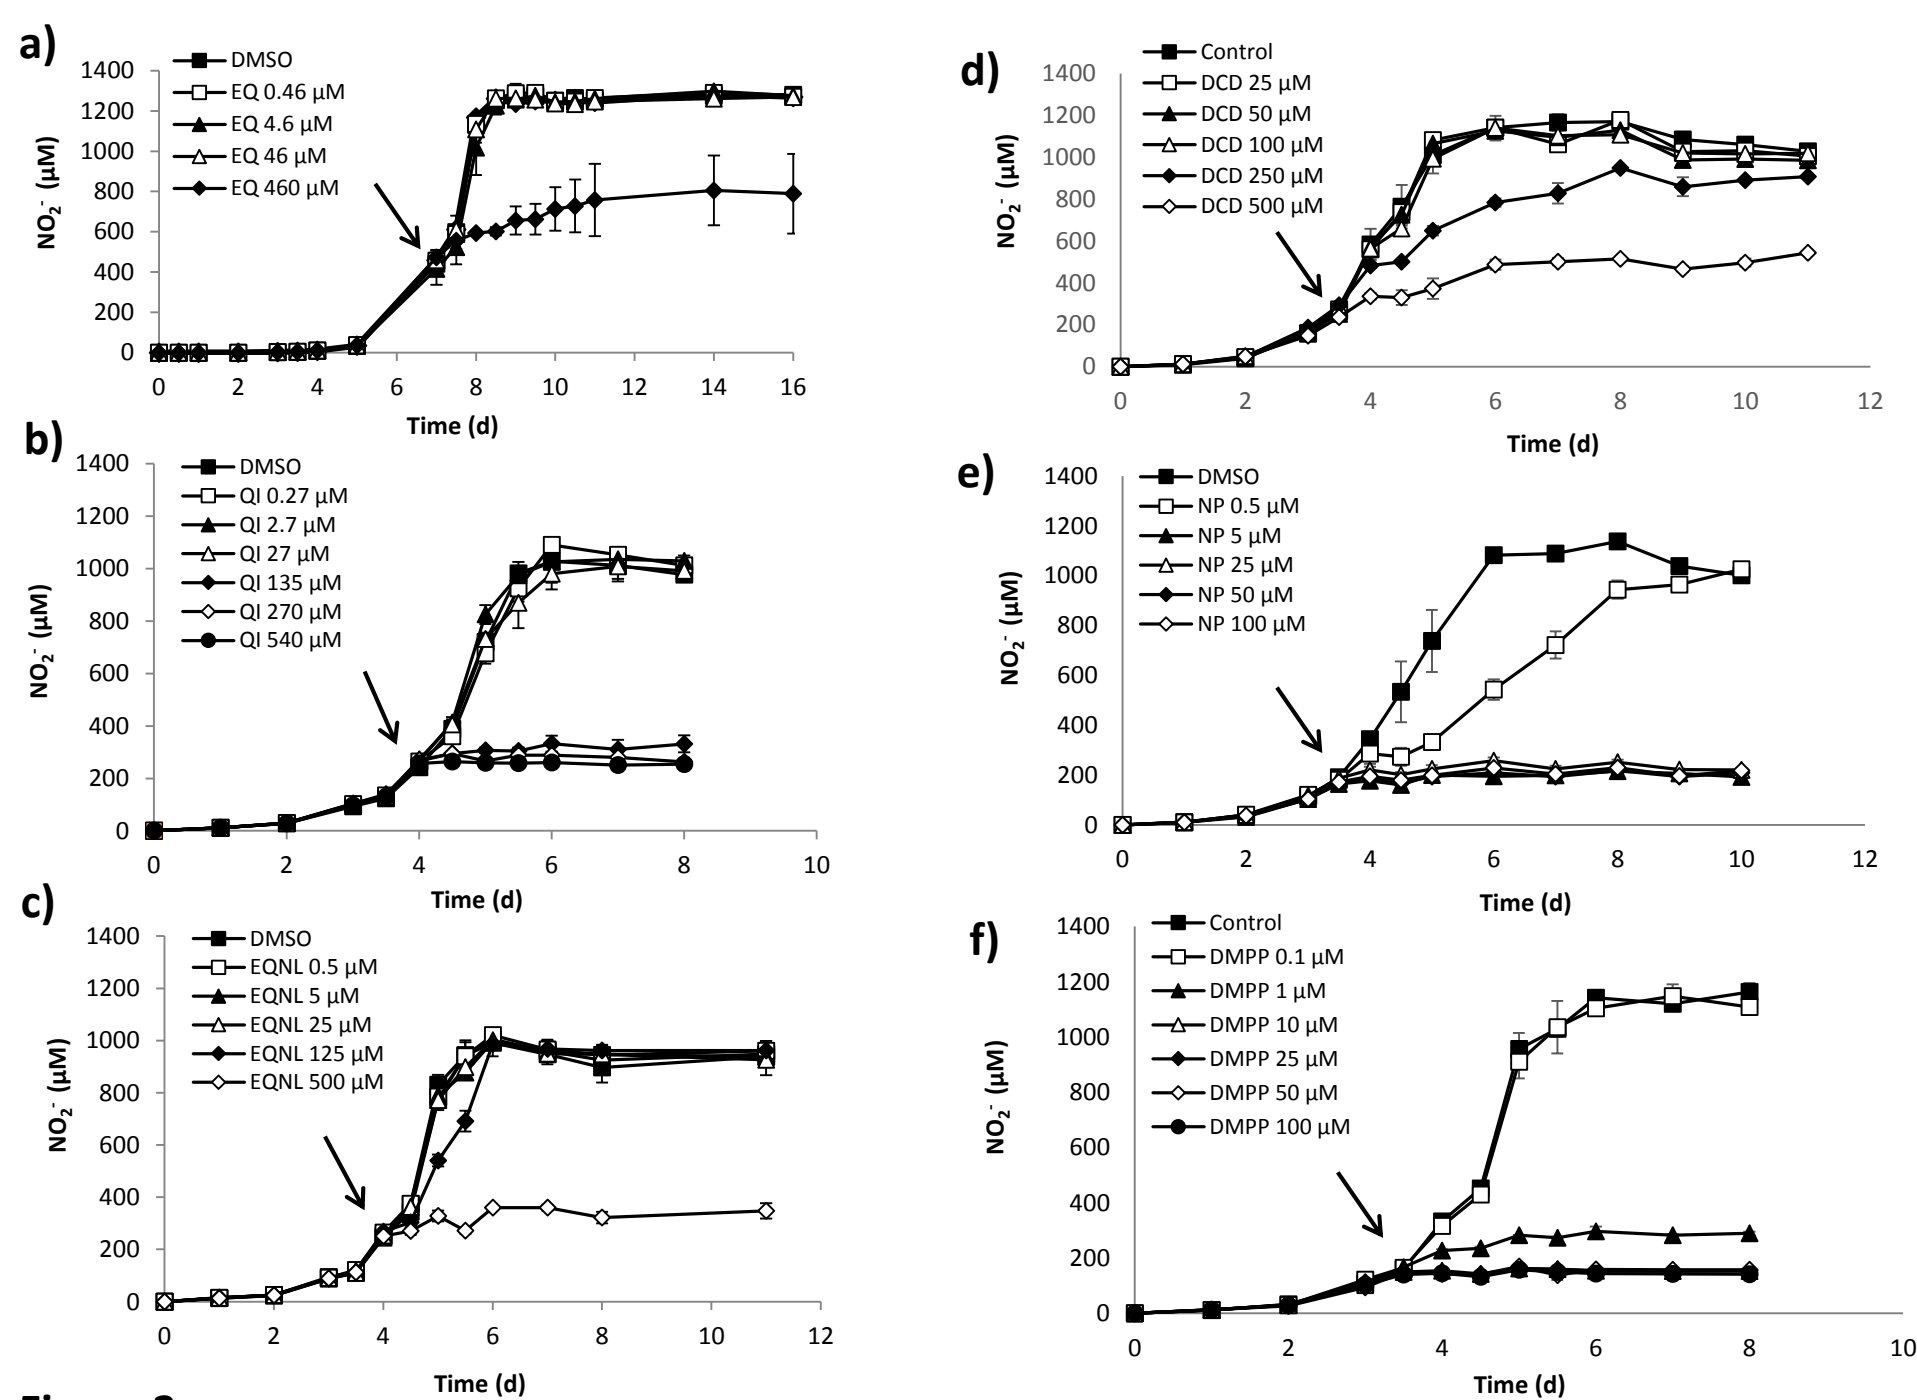

**Figure 2**

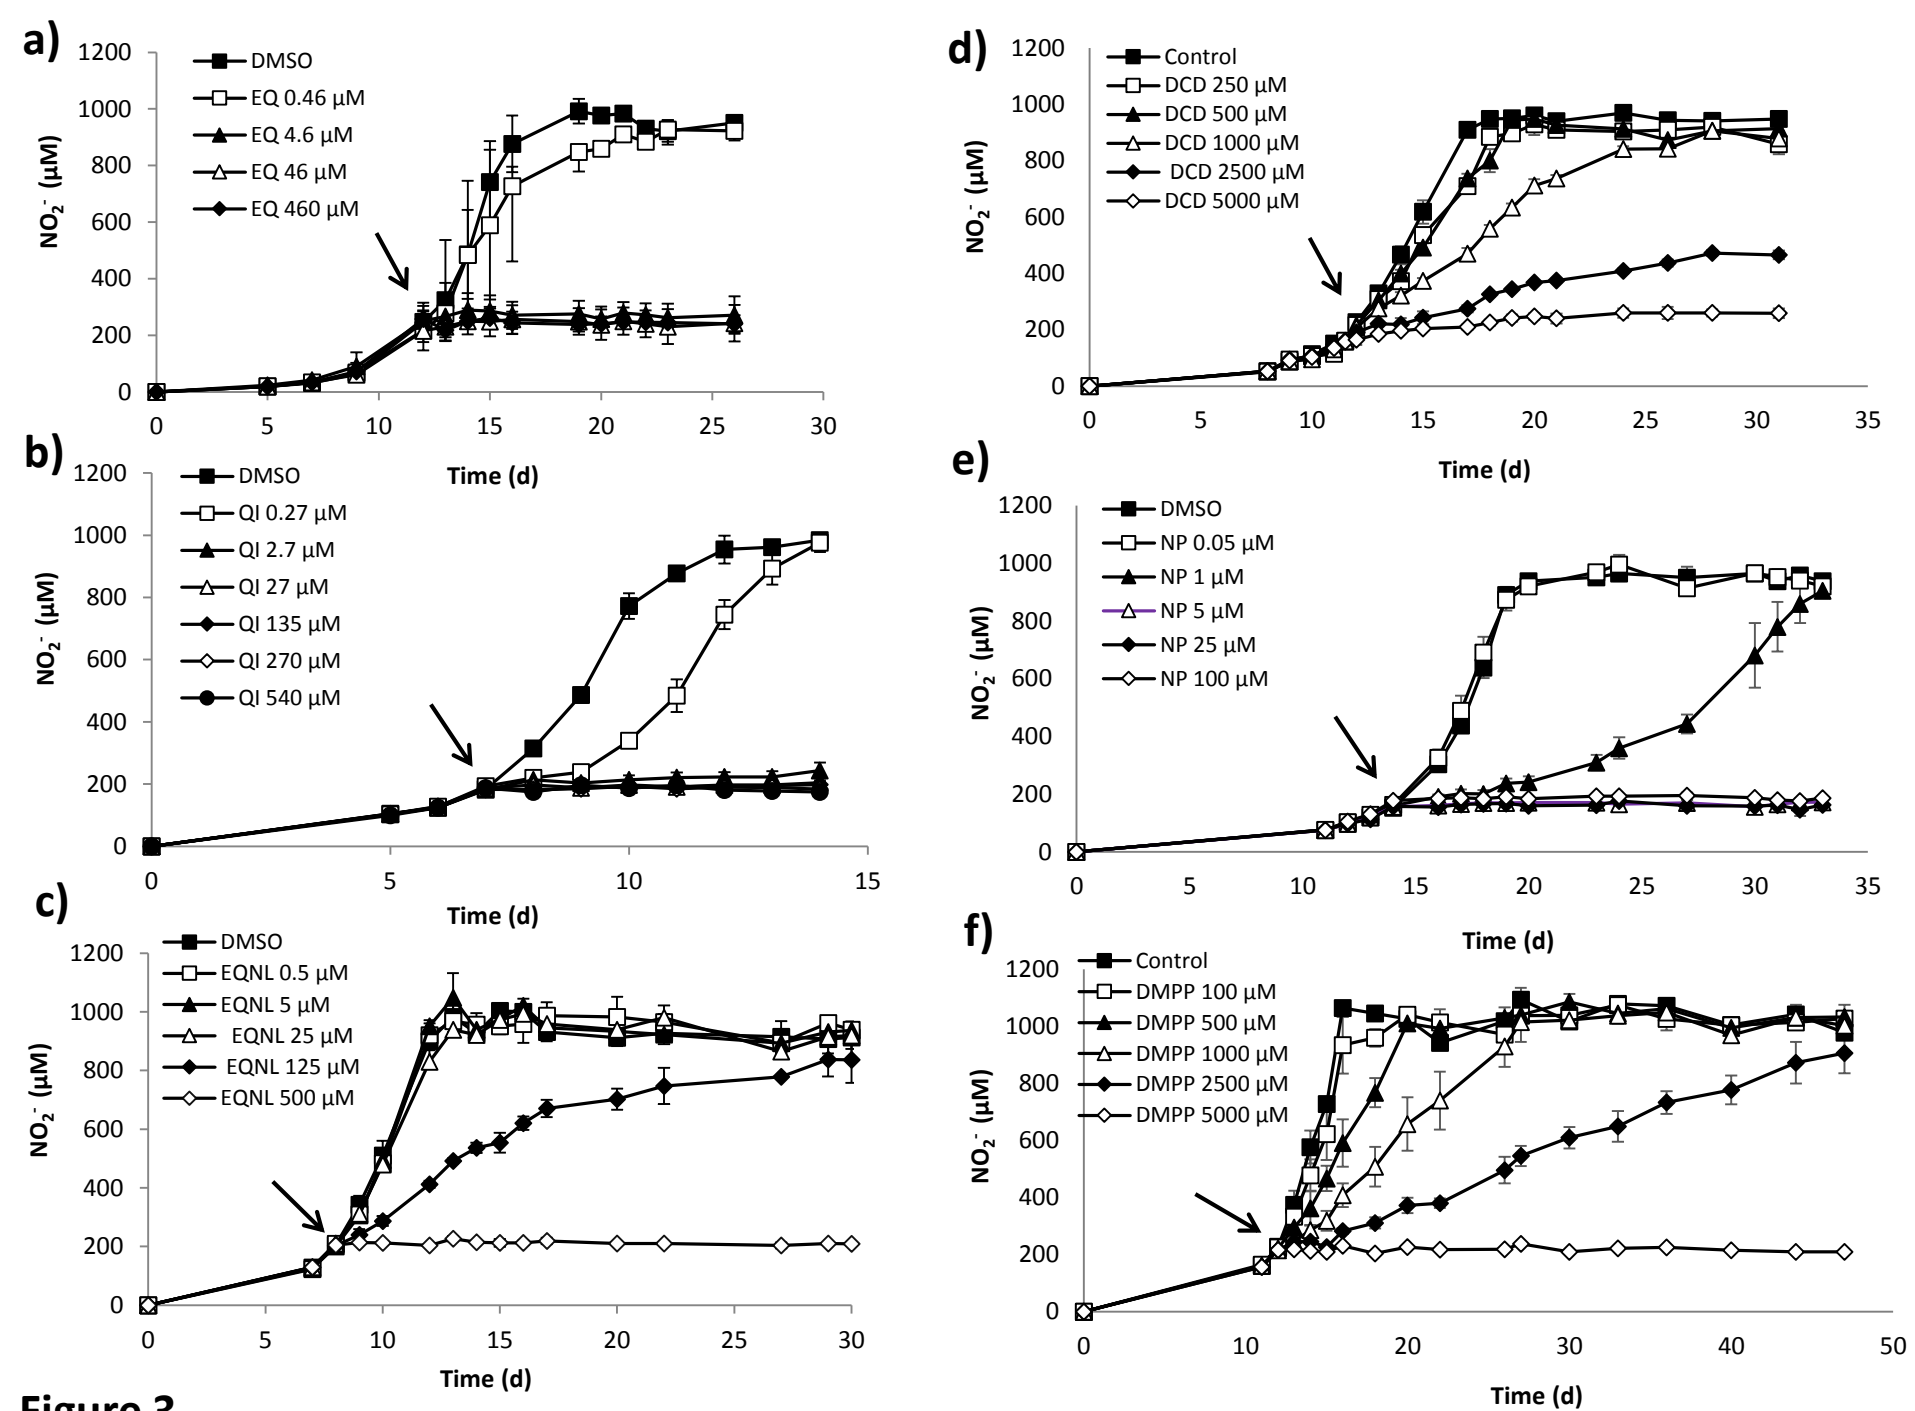

**Figure 3**

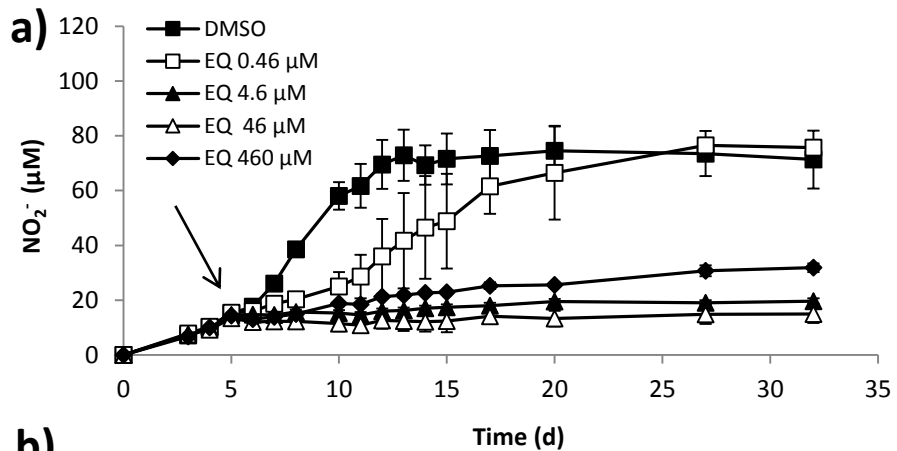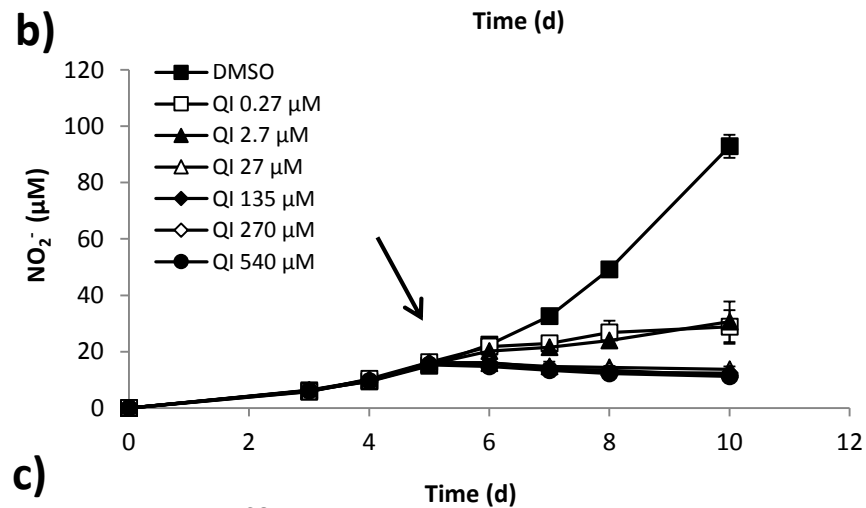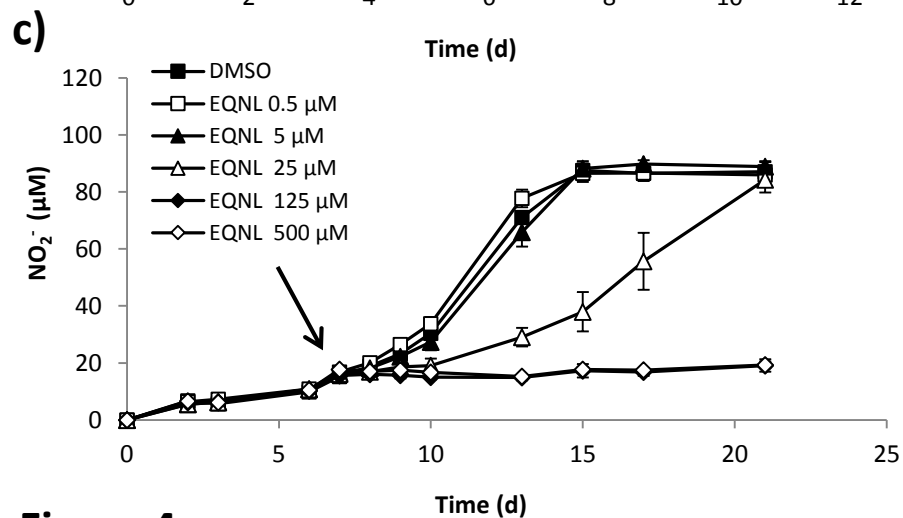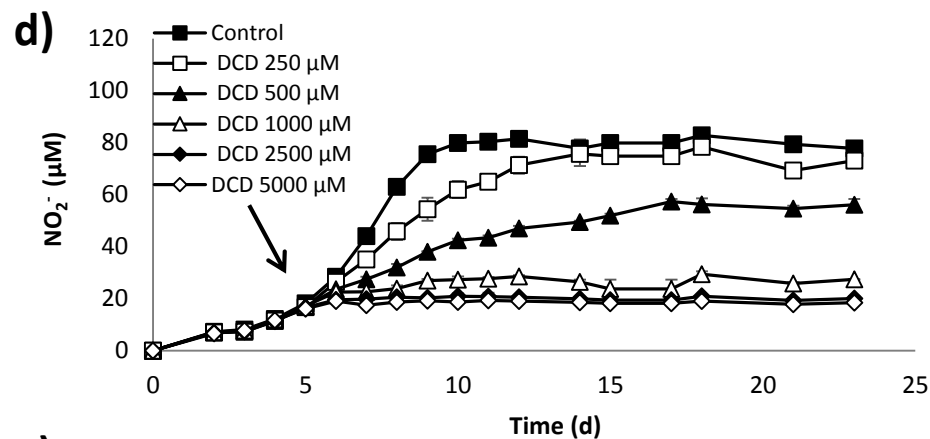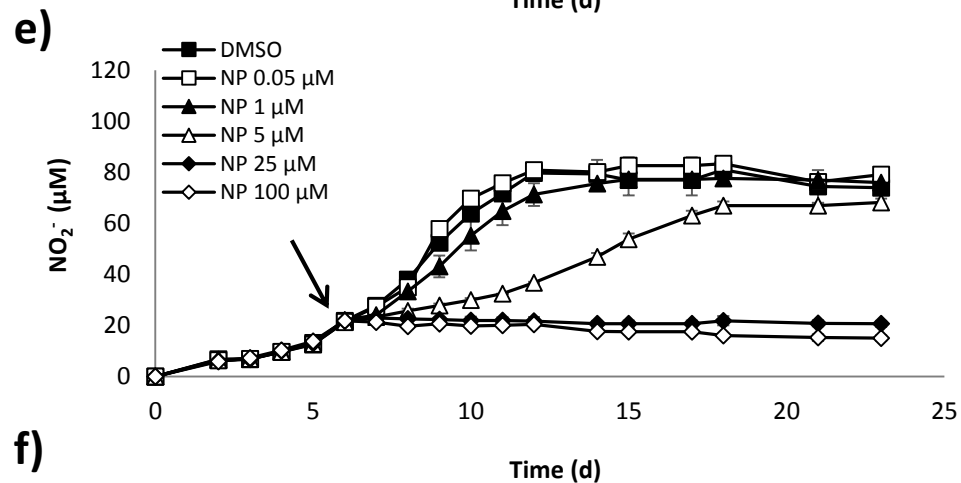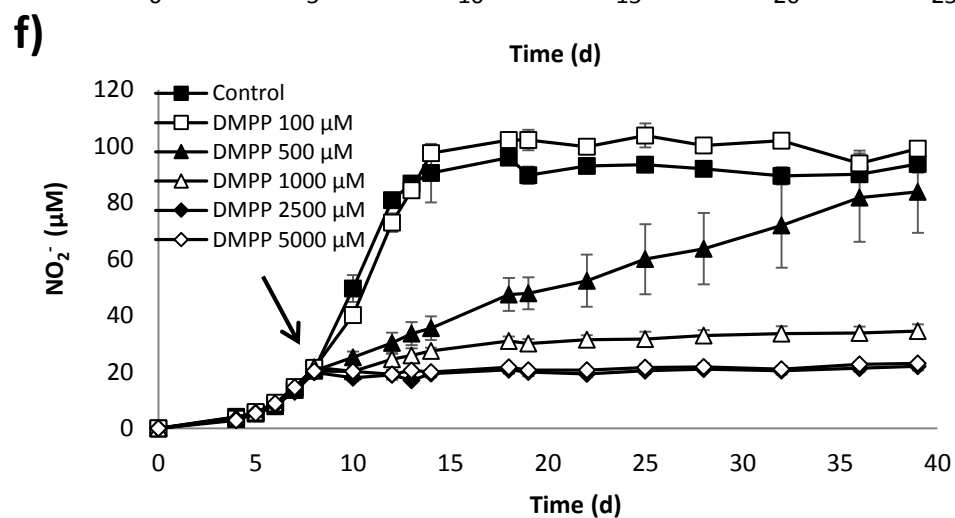

**Figure 4**



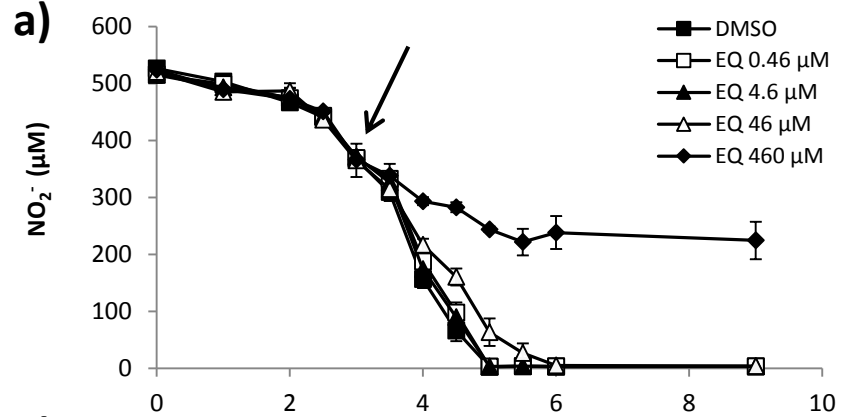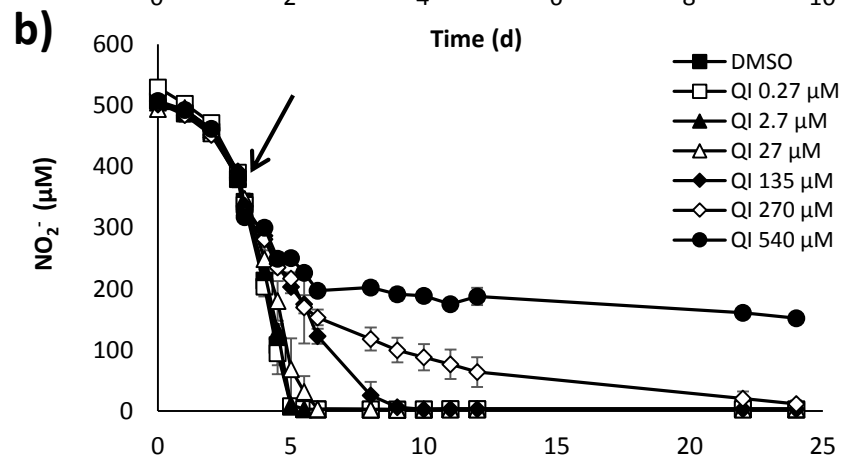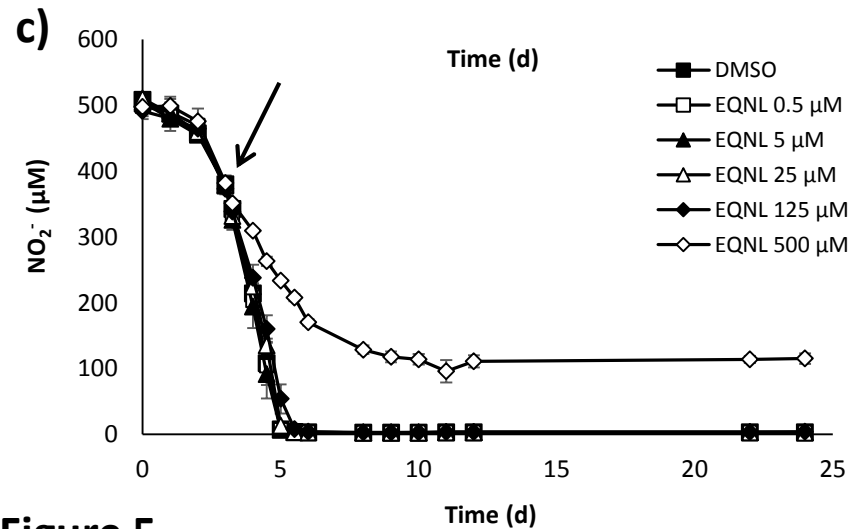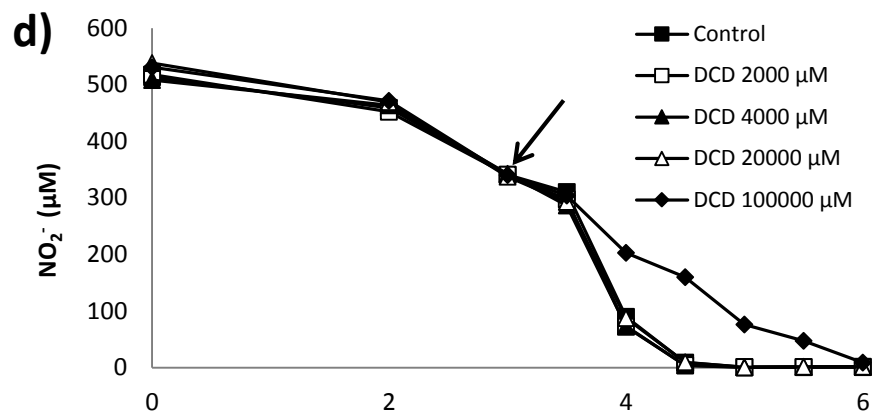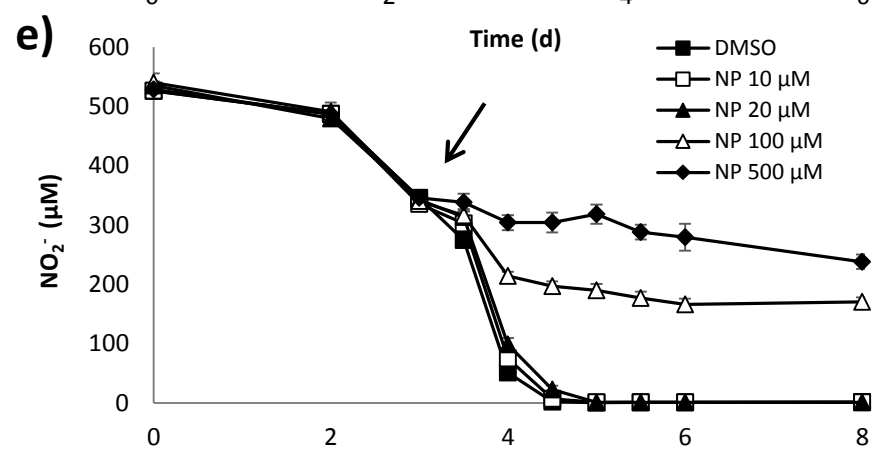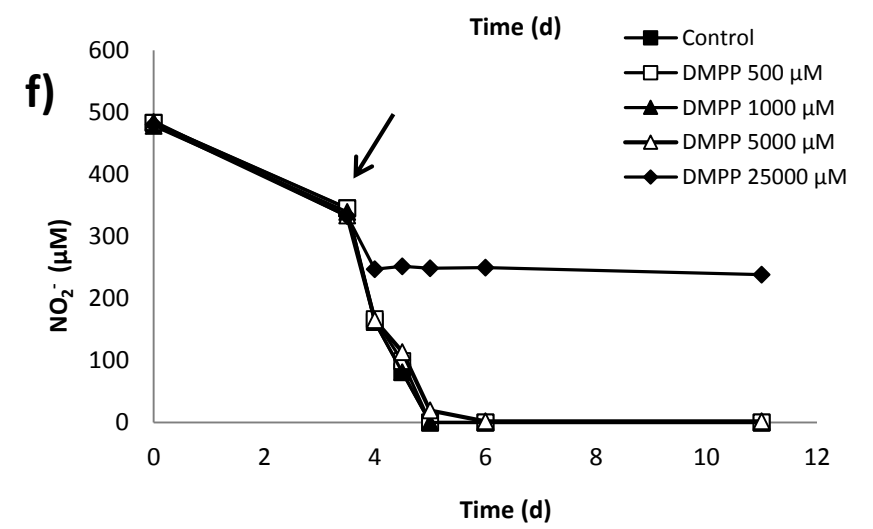

**Figure 5**

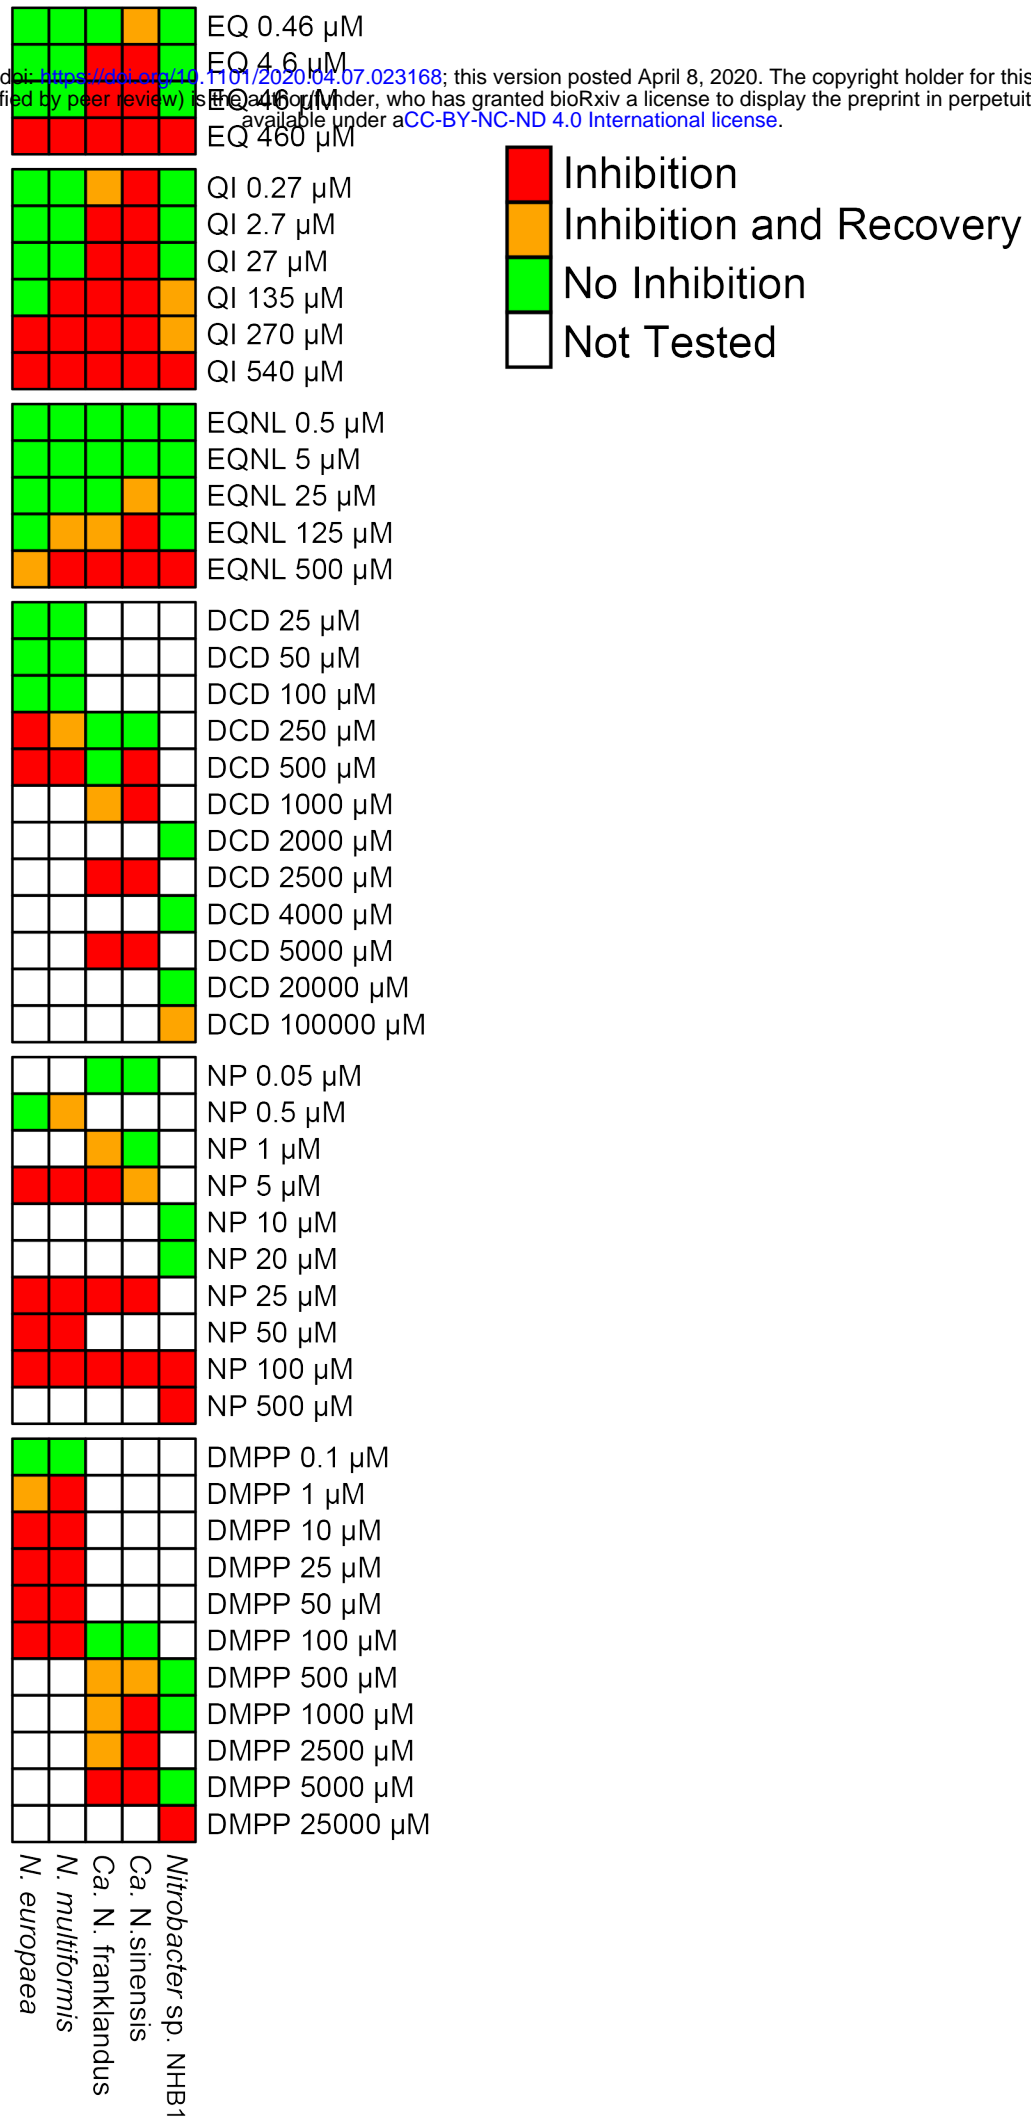

**Figure 6**
